# Supplementary material for: Evaluating alternative hypotheses to explain the downward trend in the indices of the COVID-19 pandemic death rate
Source: PeerJ. 2021 Apr 20;9:e11150. doi: 10.7717/peerj.11150 (PMC8063871; doi:10.7717/peerj.11150)
Supplement: Supplemental Information 1 — Sheets are appropriately labeled for Figures 1 to 4 and provide raw data used for the figures along with the data source. [file peerj-09-11150-s001.xlsx]

## Sheet: Figure 1
Data extracted from : https://www.who.int/emergencies/diseases/novel-coronavirus- 2019/situation-reports
date	critical cases	total deaths	daily deaths	total cases	daily cases	critical/total cases	ND/NC	death/critical	ND/NR
2020-01-26	0	80	24	2800	2800	0	0.857143
2020-01-27	0	106	26	4581	1781	0	1.45985	#DIV/0!
2020-01-28	0	132	26	6058	1477	0	1.76032	#DIV/0!
2020-01-29	0	170	38	7813	1755	0	2.16524	#DIV/0!
2020-01-30	0	213	43	9823	2010	0	2.1393	#DIV/0!
2020-01-31	0	259	46	11950	2127	0	2.16267	#DIV/0!
2020-02-01	0	304	45	14553	2603	0	1.72877	#DIV/0!
2020-02-02	2298	362	58	17391	2838	80.9725	2.04369	2.52393
2020-02-03	2790	426	64	20630	3239	86.1377	1.97592	2.29391
2020-02-04	3223	492	66	24545	3915	82.3244	1.68582	2.04778
2020-02-05	3863	565	73	28266	3721	103.816	1.96184	1.88972
2020-02-06	4825	638	73	34876	6610	72.9955	1.10439	1.51295
2020-02-07	6106	724	86	37552	2676	228.176	3.21375	1.40845
2020-02-08	6196	813	89	40553	3001	206.465	2.96568	1.43641
2020-02-09	6494	910	97	43099	2546	255.067	3.8099	1.49369
2020-02-10	7344	1018	108	43099		#DIV/0!	#DIV/0!	1.47059
2020-02-11	8216	1115	97	45134	2035	403.735	4.76658	1.18062
2020-02-12	8049	1261	146	59287	14153	56.8713	1.03158	1.81389
2020-02-13	10228	1383	122	64438	5151	198.563	2.36847	1.1928
2020-02-14	11082	1526	143	67100	2662	416.304	5.3719	1.29038
2020-02-15	11299	1669	143	69197	2097	538.817	6.81927	1.2656
2020-02-16	10670	1775	106	71329	2132	500.469	4.97186	0.99344
2020-02-17	11795	1873	98	73332	2003	588.867	4.89266	0.830861
2020-02-18	12057	2009	136	75184	1852	651.026	7.34341	1.12798
2020-02-19	11911	2126	117	75700	516	2308.33	22.6744	0.982285
2020-02-20	11681	2247	121	76677	977	1195.6	12.3849	1.03587
2020-02-21	11531	2360	113	77673	996	1157.73	11.3454	0.979967
2020-02-22	11553	2460	100	78651	978	1181.29	10.2249	0.865576
2020-02-23	10007	2618	158	79205	554	1806.32	28.5199	1.57889
2020-02-24	9216	2699	81	80090	885	1041.36	9.15254	0.878906
2020-02-25	8839	2763	0	80828	738	1197.7	0	0
2020-02-26	8469	2800	0	81820	992	853.73	0	0
2020-02-27	8100	2858	0	83108	1288	628.882	0	0
2020-02-28	7816	2923	0	84617	1509	517.959	0	0
2020-02-29	7570	2977	0	86606	1989	380.593	0	0
2020-03-01	7375	3050	73	88586	1980	372.475	3.68687	0.989831
2020-03-02	7094	3117	67	90448	1862	380.988	3.59828	0.94446
2020-03-03	6771	3202	85	93018	2570	263.463	3.30739	1.25535
2020-03-04	6420	3285	83	95324	2306	278.404	3.59931	1.29283
2020-03-05	6272	3387	102	98414	3090	202.977	3.30097	1.62628
2020-03-06	6401	3493	106	102051	3637	175.997	2.91449	1.65599
2020-03-07	6035	3598	105	106103	4052	148.939	2.59131	1.73985
2020-03-08	5977	3826	228	109997	3894	153.493	5.85516	3.81462
2020-03-09	5772	4023	197	114431	4434	130.176	4.44294	3.41303
2020-03-10	5748	4297	274	119075	4644	123.773	5.90009	4.76688
2020-03-11	5707	4627	330	126307	7232	78.9132	4.56305	5.78237
2020-03-12	5948	4980	353	134565	8258	72.0271	4.27464	5.93477
2020-03-13	6072	5428	448	145477	10912	55.6452	4.10557	7.37813
2020-03-14	5642	5842	414	156436	10959	51.4828	3.77772	7.33782
2020-03-15	5911	6533	691	169452	13016	45.4133	5.30885	11.6901
2020-03-16	6151	7178	645	182385	12933	47.5605	4.98724	10.4861
2020-03-17	6403	7997	819	198148	15763	40.6204	5.19571	12.7909
2020-03-18	6747	8983	986	218832	20684	32.6194	4.76697	14.6139
2020-03-19	7320	10083	1100	244971	26139	28.0041	4.20827	15.0273
2020-03-20	7848	11466	1383	275635	30664	25.5935	4.51017	17.6223
2020-03-21	9237	13114	1648	305040	29405	31.413	5.60449	17.8413
2020-03-22	9768	14762	1648	337473	32433	30.1175	5.08124	16.8714
2020-03-23	12064	16699	1937	379016	41543	29.0398	4.66264	16.056
2020-03-24	13097	19193	2494	422806	43790	29.9087	5.69536	19.0425
2020-03-25	14794	21785	2592	471421	48615	30.4309	5.33169	17.5206
2020-03-26	19360	24750	2965	532352	60931	31.7736	4.86616	15.3151
2020-03-27	23524	28226	3476	596994	64642	36.3912	5.37731	14.7764
2020-03-28	25209	31936	3710	663747	66753	37.7646	5.5578	14.717
2020-03-29	26791	35315	3379	724204	60457	44.3141	5.5891	12.6124
2020-03-30	29498	39490	4175	788426	64222	45.9313	6.50089	14.1535
2020-03-31	32943	44226	4736	862419	73993	44.5218	6.40061	14.3763
2020-04-01	35448	49425	5199	939527	77108	45.9719	6.74249	14.6666
2020-04-02	37657	55724	6299	1019690	80163	46.9755	7.85774	16.7273
2020-04-03	39399	61734	6010	1103731	84041	46.8807	7.15127	15.2542
2020-04-04	42296	67886	6152	1185285	81554	51.8626	7.54347	14.5451
2020-04-05	45597	72960	5074	1255711	70426	64.7446	7.20473	11.1279
2020-04-06	47470	78597	5637	1328738	73027	65.0034	7.71906	11.8749
2020-04-07	47904	86497	7900	1407072	78334	61.1535	10.085	16.4913
2020-04-08	48079	93295	6798	1491493	84421	56.9515	8.0525	14.1392
2020-04-09	49126	100975	7680	1576688	85195	57.663	9.01461	15.6333
2020-04-10	49828	108378	7403	1668221	91533	54.4372	8.08779	14.8571
2020-04-11	50592	114713	6335	1747433	79212	63.8691	7.99753	12.5217
2020-04-12	50758	120391	5678	1818914	71481	71.0091	7.94337	11.1864
2020-04-13	51742	126114	5723	1888948	70034	73.8813	8.17175	11.0606
2020-04-14	51609	133558	7444	1962011	73063	70.6363	10.1885	14.4238
2020-04-15	51142	141751	8193	2044760	82749	61.8038	9.90103	16.0201	26.1659
2020-04-16	56596	148790	7039	2125521	80761	70.0784	8.71584	12.4373	19.0649
2020-04-17	56963	157275	8485	2210449	84928	67.0721	9.99082	14.8956	34.6577
2020-04-18	55265	163963	6688	2290727	80278	68.842	8.33105	12.1017	25.148
2020-04-19	54225	168939	4976	2365873	75146	72.1595	6.62178	9.17658	16.096
2020-04-20	56763	174500	5561	2439318	73445	77.2864	7.57165	9.79687	26.7647
2020-04-21	57254	181726	7226	2514735	75417	75.9166	9.58139	12.621	16.0834
2020-04-22	56686	188379	6653	2594793	80058	70.8062	8.31023	11.7366	23.8252
2020-04-23	58696	195174	6768	2679631	84838	69.186	7.97756	11.5306	22.8751
2020-04-24	58531	201556	6409	2781318	101687	57.56	6.30267	10.9498	9.56441
2020-04-25	58202	207734	6178	2871559	90241	64.4962	6.84611	10.6148	15.3844
2020-04-26	57600	211578	3844	2944807	73248	78.637	5.24792	6.67361	15.8312
2020-04-27	56297	216099	4521	3014148	69341	81.1886	6.51995	8.03062	10.1661
2020-04-28	56965	222854	6755	3089582	75434	75.5163	8.95485	11.8582	20.6589
2020-04-29	59817	229475	6621	3169434	79852	74.9098	8.29159	11.0688	14.0181
2020-04-30	50956	235296	5821	3255273	85839	59.3623	6.7813	11.4236	14.8059
2020-05-01	51355	240980	5684	3350246	94973	54.0733	5.98486	11.0681	13.5978
2020-05-02	50860	246292	5312	3433138	82892	61.3569	6.40834	10.4444	12.6544
2020-05-03	50040	249859	2567	3515295	82157	60.9078	3.12451	5.1299	10.4251
2020-05-04	49639	253963	4104	3594717	79422	62.5003	5.16733	8.26769	9.88884
2020-05-05	49256	259790	5827	3676151	81434	60.4858	7.15549	11.83	12.515
2020-05-06	48214	266632	6842	3772030	95879	50.2863	7.13608	14.1909	11.538
2020-05-07	48962	272246	5614	3868353	96323	50.8311	5.82831	11.466	13.3033
2020-05-08	48703	277747	5501	3964942	96589	50.4229	5.69527	11.295	13.0494
2020-05-09	47685	282046	4299	4054279	89337	53.3765	4.81212	9.01541	7.80361
2020-05-10	47040	286088	4042	4134483	80204	58.6504	5.03965	8.59269	8.67397
2020-05-11	46939	289587	3499	4209136	74653	62.8762	4.68702	7.45436	9.16497
2020-05-12	46340	295129	5542	4294864	85728	54.0547	6.46463	11.9594	7.787
2020-05-13	45921	300357	5228	4384628	89764	51.1575	5.82416	11.3848	8.79273
2020-05-14	45566	305642	5285	4481925	97297	46.8319	5.43182	11.5986	11.6863
2020-05-15	45007	310653	5011	4582313	100388	44.833	4.99163	11.1338	9.18595
2020-05-16	44827	315013	4360	4679267	96954	46.2353	4.49698	9.72628	7.99521
2020-05-17	44823	318661	3648	4761822	82555	54.2947	4.41887	8.13868	7.71788
2020-05-18	44764	322139	3478	4852300	90478	49.475	3.84403	7.76964	6.93799
2020-05-19	45428	326724	4585	4948156	95856	47.3919	4.78322	10.0929	8.54462
2020-05-20	45800	331360	4636	5051690	103534	44.2367	4.47776	10.1223	7.09828
2020-05-21	45620	336321	4961	5160095	108405	42.0829	4.57636	10.8746	8.32599
2020-05-22	44583	340985	4664	5269030	108935	40.9262	4.28145	10.4614	4.33691
2020-05-23	53562	345174	4189	5369525	100495	53.2982	4.16837	7.82084	7.05631
2020-05-24	53224	348368	3194	5466872	97347	54.6745	3.28105	6.00105	5.62096
2020-05-25	53167	351677	3309	5557778	90906	58.4857	3.64002	6.22379	4.83635
2020-05-26	53101	355463	3786	5651670	93892	56.5554	4.03229	7.12981	5.72988
2020-05-27	52973	360780	5317	5759210	107540	49.2589	4.94421	10.0372	7.78923
2020-05-28	53975	365474	4694	5876956	117746	45.8402	3.98655	8.69662	5.54814
2020-05-29	53735	370402	4928	6003883	126927	42.3354	3.88255	9.17093	7.29281
2020-05-30	53503	374543	4141	6129345	125462	42.6448	3.3006	7.73975	5.24001
2020-05-31	53409	377828	3285	6239257	109912	48.5925	2.98875	6.15065	2.94195
2020-06-01	53407	380906	3078	6344984	105727	50.5141	2.91127	5.76329	5.40162
2020-06-02	54527	385579	4673	6461402	116418	46.8373	4.01398	8.57007	4.3714
2020-06-03	54202	390509	4930	6582770	121368	44.6592	4.06203	9.09561	3.22828
2020-06-04	53602	396083	5574	3714199	-2868571			10.3989
2020-06-05	53576	400993	4910	6845601	3131402			9.16455
2020-06-06	53587	405282	4289	6975232	129631	41.3381	3.30862	8.00381	5.58516
2020-06-07	53752	408726	3444	7090137	114905	46.7795	2.99726	6.4072	7.04659
2020-06-08	53798	411910	3184	7198773	108636	49.5213	2.93089	5.91844	4.25173
2020-06-09	54022	416682	4772	7320778	122005	44.2785	3.91132	8.83344	7.13205
2020-06-10	53805	421833	5151	7457681	136903	39.3015	3.76252	9.57346	3.94905
2020-06-11	53900	426836	5003	7596938	139257	38.7054	3.59264	9.282	4.7302
2020-06-12	53876	431451	4615	7740336	143398	37.571	3.21832	8.56597	5.36283
2020-06-13	54074	425717	4266	7875588	135252	39.9802	3.15411	7.88919	4.01712
2020-06-14	54098	439018	3301	8000109	124521	43.4449	2.65096	6.10189	4.4536
2020-06-15	54537	442458	3440	8126180	126071	43.259	2.72862	6.30764	3.78634
2020-06-16	54551	449047	6589	8270305	144125	37.8498	4.57173	12.0786	6.23702
2020-06-17	54397	454257	5210	8416893	146588	37.1088	3.55418	9.57773	4.85513
2020-06-18	54429	459416	5159	8558496	141603	38.4377	3.64328	9.4784	5.20425
2020-06-19	54726	464531	5115	8740983	182487	29.989	2.80294	9.34656	4.66699
2020-06-20	54444	468995	4464	8899018	158035	34.4506	2.82469	8.19925	3.92775
2020-06-21	54665	472356	3361	9030092	131074	41.7054	2.5642	6.14836	3.31923
2020-06-22	57886	476191	3835	9170164	140072	41.3259	2.73788	6.62509	4.69539
2020-06-23	57911	481650	5459	9334671	164507	35.2028	3.3184	9.42653	4.56799
2020-06-24	58415	486707	5057	9508977	174306	33.5129	2.90122	8.65702	3.83302
2020-06-25	57628	491882	5175	9690176	181199	31.8037	2.85598	8.98001	6.08412
2020-06-26	57643	496729	4847	9885578	195402	29.4997	2.48053	8.40865	4.96832
2020-06-27	57748	501291	4562	10063967	178389	32.372	2.55733	7.89984	4.49717
2020-06-28	57670	504766	3475	10228612	164645	35.0269	2.1106	6.02566	1.65954
2020-06-29	57531	508202	3436	10390659	162047	35.5027	2.12037	5.97243	3.15946
2020-06-30	57787	513241	5039	10566002	175343	32.9565	2.8738	8.71995	2.60159
2020-07-01	57987	518090	4849	10764787	198785	29.1707	2.43932	8.36222	3.75216
2020-07-02	58134	523247	5157	10974333	209546	27.7428	2.46103	8.87088	2.41055
2020-07-03	58838	528431	5184	11188111	213778	27.5229	2.42495	8.81063	1.88018
2020-07-04	58530	532964	4533	11383899	195788	29.8946	2.31526	7.74475	5.23774
2020-07-05	58538	536567	3603	11562286	178387	32.8152	2.01977	6.15498	4.08533
2020-07-06	57978	540140	3573	11734023	171737	33.7598	2.08051	6.16268
2020-07-07	58195	545655	3839	11942348	208325	27.9347	1.84279	6.59679	1.67526
2020-07-08	58325		5998	12157415	215067	27.1195	2.7889	10.2838	2.10089
2020-07-09	58460		5301	12382402	224987	25.9837	2.35614	9.06774	3.75921
2020-07-10	58896		5386	12621013	238611	24.6829	2.25723	9.14493	3.50063
2020-07-11	58831		5289	12838665	217652	27.0298	2.43003	8.99016	3.60859
2020-07-12	58925		4783	13038001	199336	29.5606	2.39947	8.1171	4.91232
2020-07-13	58871		3881	13235413	197412	29.8214	1.96594	6.59238	4.09802
2020-07-14	59552		3837	13456426	221013	26.945	1.7361	6.44311	2.52865
2020-07-15	59617		5579	13692951	236525	25.2054	2.35874	9.35807	1.98551
2020-07-16	59934		5522	13942933	249982	23.9753	2.20896	9.21347	2.27485
2020-07-17	60142		5759	14184543	241610	24.8922	2.38359	9.57567	3.07763
2020-07-18	59907		7376	14411739	227196	26.368	3.24654	12.3124	3.74762
2020-07-19	59809		4938	14634546	222807	26.8434	2.21627	8.25628	5.84654
2020-07-20	59807		3833	14840994	206448	28.9695	1.85664	6.40895	2.85961
2020-07-21	63786		4106	15081659	240665	26.5041	1.70611	6.43715	1.8559
2020-07-22	66173		6123	15363035	281376	23.5176	2.17609	9.25302	1.69276
2020-07-23	66266		6892	15639602	276567	23.9602	2.49198	10.4005	3.24891
2020-07-24	66238		9783	15929475	289873	22.8507	3.37493	14.7695	3.64429
2020-07-25	66175		6274	16191276	261801	25.2768	2.39648	9.48092	5.06621
2020-07-26	66278		5732	16416401	225125	29.4405	2.54614	8.64842	4.61205
2020-07-27	66579		3961	16635775	219374	30.3495	1.80559	5.94932	3.09041
2020-07-28	66501		4653	16885408	249633	26.6395	1.86394	6.99689	1.74006
2020-07-29	66416		6158	17175507	290099	22.8943	2.12272	9.27186	1.94334
2020-07-30	66407		6668	17462855	287348	23.1103	2.32053	10.0411	2.5257
2020-07-31	65530		6392	17754094	291239	22.5004	2.19476	9.75431	2.92624
2020-08-01	65698		6109	18013773	259679	25.2997	2.35252	9.29861	3.71449
2020-08-02	65798		5747	18237994	224221	29.3452	2.5631	8.73431	4.10432
2020-08-03	64732		4254	18438367	200373	32.3057	2.12304	6.57171	2.76181
2020-08-04	65438		4223	18693129	254762	25.6859	1.65763	6.45344	1.81111
2020-08-05	65511		6731	18965086	271957	24.0887	2.47502	10.2746	1.73782
2020-08-06	65218		7122	19247840	282754	23.0653	2.5188	10.9203	3.45151
2020-08-07	65131		6882	19530125	282285	23.0728	2.43796	10.5664	3.77915
2020-08-08	65144		6465	19800433	270308	24.0999	2.39172	9.92417	3.82561
2020-08-09	64852		5621	20024519	224086	28.9407	2.50841	8.66743	2.69261
2020-08-10	64552		4809	20239669	215150	30.0033	2.23518	7.44981	2.58068
2020-08-11	64472		4840	20505902	266233	24.2164	1.81796	7.50713	1.85474
2020-08-12	64663		6124	20794090	288188	22.4378	2.125	9.47064	1.81637
2020-08-13	64617		6890	21081995	287905	22.4439	2.39315	10.6628	2.82611
2020-08-14	64591		9922	21370621	288626	22.3788	3.43767	15.3613	3.08109
2020-08-15	62208		6254	21637493	266872	23.3101	2.34345	10.0534	5.2886
2020-08-16	62256		5654	21854422	216929	28.6988	2.60638	9.08186	2.73932
2020-08-17	62029		4222	22052908	198486	31.2511	2.1271	6.80649	2.46404
2020-08-18	61924		4261	22306851	253943	24.385	1.67794	6.88102	1.64601
2020-08-19	61917		6684	22578597	271746	22.7849	2.45965	10.7951	1.666
2020-08-20	61823		6514	22852287	273690	22.5887	2.38007	10.5365	3.11736
2020-08-21	61829		6213	23117465	265178	23.316	2.34295	10.0487	3.37054
2020-08-22	61777		5547	23387848	270383	22.848	2.05153	8.97907	3.08915
2020-08-23	61701		4598	23601572	213724	28.8695	2.15137	7.45207	3.15158
2020-08-24	61630		4325	23820900	219328	28.0995	1.97193	7.01769	1.66983
2020-08-25	61696		6202	24077646	256746	24.03	2.41562	10.0525	1.72491
2020-08-26	61716		6466	24358387	280741	21.9833	2.30319	10.477	2.31058
2020-08-27	61412		6223	24638399	280012	21.9319	2.2224	10.1332	2.94779
2020-08-28	61264		5837	24931194	292795	20.9239	1.99354	9.52762	3.03631
2020-08-29	61274		5497	25196584	265390	23.0883	2.07129	8.97118	2.77163
2020-08-30	61371		4353	25425360	228776	26.8258	1.90273	7.09293	2.74534
2020-08-31	61139		4346	25676125	250765	24.381	1.7331	7.10839	1.86697
2020-09-01	60408		5978	25940080	263955	22.8857	2.26478	9.89604	1.70811
2020-09-02	60700		6457	26229159	289079	20.9977	2.23365	10.6376	2.39135
2020-09-03	60882		6004	26520488	291329	20.898	2.0609	9.8617	2.69985
2020-09-04	60875		5863	26828863	308375	19.7406	1.90126	9.63121	2.27572
2020-09-05	60823		5003	27108295	279432	21.7667	1.79042	8.22551	2.66374
2020-09-06	60007		4247	27350309	242014	24.7948	1.75486	7.07751	2.35816
2020-09-07	60393		3872	27555752	205443	29.3965	1.88471	6.41134	1.89041
2020-09-08	60316		4429	27805672	249920	24.1341	1.77217	7.34299	1.6004
2020-09-09	60654		6230	28096189	290517	20.878	2.14445	10.2714	1.63567
2020-09-10	60797		6021	28401505	305316	19.9128	1.97206	9.90345	2.57538
2020-09-11	60973		5792	28720515	319010	19.1132	1.81562	9.49929	2.49271
2020-09-12	60959		5116	29013110	292595	20.8339	1.74849	8.39253	2.53344
2020-09-13	60743		4002	29268007	254897	23.8304	1.57005	6.58841	2.3086
2020-09-14	60769		4264	29518989	250982	24.2125	1.69893	7.01674	1.60385
2020-09-15	60972		6000	29801618	282629	21.5732	2.12292	9.84058	1.62361
2020-09-16	61275		6007	30112306	310688	19.7224	1.93345	9.80335	2.27511
2020-09-17	61379		5412	30428541	316235	19.4093	1.71139	8.81735	2.51031
2020-09-18	61300		5453	30754410	325869	18.8112	1.67337	8.8956	1.80469
2020-09-19	61359		5200	31056265	301855	20.3273	1.72268	8.47471	2.18254
2020-09-20	61464		3992	31314788	258523	23.7751	1.54416	6.49486	2.0902
2020-09-21	61702		3810	31553548	238760	25.8427	1.59574	6.17484	1.42857
2020-09-22	61975		5364	31832486	278938	22.2182	1.92301	8.6551	1.33467
2020-09-23	62373		6048	32150466	317980	19.6154	1.90201	9.6965	1.89565
2020-09-24	63374		5558	32467515	317049	19.9887	1.75304	8.77016	2.41702
2020-09-25	63762		5462	32794817	327302	19.4811	1.6688	8.56623	2.23624
2020-09-26	65345		5101	33099621	304804	21.4384	1.67353	7.80626	2.29347
2020-09-27	65335		3795	33361456	261835	24.9527	1.44939	5.80853	2.21186
2020-09-28	65393		3536	33600009	238553	27.4124	1.48227	5.40731	1.55966
2020-09-29	65649		5498	33891696	291687	22.5067	1.8849	8.37484	1.31948
2020-09-30	66002		5836	34210542	318846	20.7003	1.83035	8.84216	1.93394
2020-10-01	66066		5623	34536511	325969	20.2676	1.72501	8.51119	2.41173
2020-10-02	66224		5622	34866505	329994	20.0682	1.70367	8.48937	2.47533
2020-10-03	66269		4874	35172075	305570	21.687	1.59505	7.35487	2.43737
2020-10-04	66416		4123	35429872	257797	25.7629	1.59932	6.20784	2.12104
2020-10-05	66878		4270	35703459	273587	24.4449	1.56075	6.38476	1.64492
2020-10-06	67775		5576	36016583	313124	21.6448	1.78076	8.22722	1.55356
2020-10-07	67413		5938	36367310	350727	19.2209	1.69305	8.80839	1.9797
2020-10-08	67817		6431	36724388	357078	18.9922	1.80101	9.48287	2.48712
2020-10-09	68431		5894	37091530	367142	18.6388	1.60537	8.61306	2.55518
2020-10-10	68613		5267	37462240	370710	18.5085	1.42079	7.67639	2.68297
2020-10-11	68862		3974	37752317	290077	23.7392	1.36998	5.77096	2.2109
2020-10-12	69081		3782	38030077	277760	24.8708	1.36161	5.47473	1.57996
2020-10-13	69974		5002	38351818	321741	21.7485	1.55467	7.14837
2020-10-14	70141		6101	38738552	386734	18.1368	1.57757	8.69819	0.567988
2020-10-15	70888		6119	39141586	403034	17.5886	1.51823	8.63193	2.41961
2020-10-16	71434		6226	39561420	419834	17.0148	1.48297	8.71574	2.17716
2020-10-17	71933		5720	39953727	392307	18.3359	1.45804	7.95184	2.65484
2020-10-18	71975		4110	40299336	345609	20.8256	1.18921	5.71032	2.48957
2020-10-19	72710		4440	40648388	349052	20.8307	1.27202	6.10645	1.68964
2020-10-20	77014		6190	41040367	391979	19.6475	1.57917	8.0375	1.63664
2020-10-21	74109		6856	41485055	444688	16.6654	1.54176	9.25124	2.14418
2020-10-22	75052		6502	41965307	480252	15.6276	1.35387	8.66333	2.53475
2020-10-23	76330		6555	42460161	494854	15.4248	1.32463	8.58771	2.64472
2020-10-24	77210		5747	42933167	473006	16.3233	1.215	7.44334	2.65697
2020-10-25	77737		4659	43359473	426306	18.235	1.09288	5.99329	2.34062
2020-10-26	79053		5113	43776384	416911	18.9616	1.2264	6.46781	1.64716
2020-10-27	79907		7055	44243825	467441	17.0946	1.50928	8.82901	1.88856
2020-10-28	81180		7167	44754138	510313	15.9079	1.40443	8.82853	2.57752
2020-10-29	82231		7170	45300457	546319	15.0518	1.31242	8.71934	2.65061
2020-10-30	83362		7521	45873999	573542	14.5346	1.31133	9.0221	2.71975
2020-10-31	84228		6664	46370830	496831	16.953	1.3413	7.91186	3.05612
2020-11-01	85253		5480	46832803	461973	18.4541	1.18622	6.42793	2.46376
2020-11-02	86536		5761	47309803	477000	18.1417	1.20776	6.65734	1.95572
2020-11-03	88125		8250	47803031	493228	17.867	1.67265	9.3617	1.96171
2020-11-04	89294		9182	48375971	572940	15.5852	1.60261	10.2829	2.63998
2020-11-05	90059		8869	48994181	618210	14.5677	1.43463	9.84799	2.93095
2020-11-06	90831		9260	49620817	626636	14.495	1.47773	10.1948	3.27877
2020-11-07	91748		7722	50244127	623310	14.7195	1.23887	8.41653	3.36653
2020-11-08	92595		6127	50741556	497429	18.6147	1.23173	6.61699	3.31146
2020-11-09	93899		6127	51233449	491893	19.0893	1.2456	6.5251	2.3325
2020-11-10	94954		9358	51791885	558436	17.0036	1.67575	9.8553	1.89205
2020-11-11	64768		10191	52411896	620011	10.4463	1.64368	15.7346	3.22344
2020-11-12	95684		9683	53057986	646090	14.8097	1.49871	10.1198	1.90089
2020-11-13	97022		10000	53720550	662564	14.6434	1.50929	10.3069	3.10628
2020-11-14	98124		9220	54316056	595506	16.4774	1.54826	9.39627	3.15843
2020-11-15	98807		7108	54828284	512228	19.2897	1.38766	7.19382	3.51641

## Sheet: Figure 2
Data extracted from : https://ourworldindata.org/mortality-risk-covid
date	daily cases	testing per thousand
	India		testing	cases/testing		Russia					United States
2020-04-14	1211	0.01	13800	8.77533		2558					25023	0.44	145641	17.1813
2020-04-15	1075	0.01	13800	7.78983	3.0474	2774	0.6	87560.7	3.16809	0.742768	26922	0.44	145641	18.4852	8.94436
2020-04-16	942	0.02	27600.1	3.41303	2.45052	3388	0.61	89020	3.80589	0.793079	30148	0.45	148951	20.2402	16.346
2020-04-17	1007	0.02	27600.1	3.64854	4.12148	3448	0.63	91938.7	3.75032	0.767414	31667	0.45	148951	21.26	7.25992
2020-04-18	991	0.02	27600.1	3.59057	2.55288	4070	0.66	96316.7	4.22564	0.87007	30833	0.46	152261	20.2501	12.2272
2020-04-19	1334	0.02	27600.1	4.83332	2.40506	4785	0.68	99235.4	4.82187	0.810811	32922	0.54	178741	18.4188	5.63757
2020-04-20	1553	0.02	27600.1	5.62679	2.66344	6060	0.7	102154	5.93221	0.77325	24601	0.55	182051	13.5132	7.20296
2020-04-21	1335	0.02	27600.1	4.83694	3.44828	4268	0.72	105073	4.06195	0.610561	28065	0.58	191982	14.6186	6.61678
2020-04-22	1384	0.02	27600.1	5.01448	2.78638	5642	0.77	112370	5.02093	0.960637	37289	0.64	211842	17.6023	6.76875
2020-04-23	1409	0.02	27600.1	5.10506	2.39952	5236	0.82	119666	4.3755	0.79759	17588	0.66	218462	8.05084	9.78508
2020-04-24	1684	0.02	27600.1	6.10143	4.19034	4774	0.87	126963	3.76015	0.878533	26543	0.68	225082	11.7926	19.2166
2020-04-25	1429	0.02	27600.1	5.17752	2.39782	5849	0.91	132800	4.40436	1.02639	21352	0.71	235012	9.0855	4.93631
2020-04-26	1990	0.02	27600.1	7.21012	3.48475	5966	0.95	138638	4.3033	0.940332	48529	0.67	221772	21.8824	4.47567
2020-04-27	1396	0.02	27600.1	5.05795	3.69898	6361	0.98	143016	4.44776	0.938652	26857	0.69	228392	11.7592	6.28142
2020-04-28	1543	0.03	41400.1	3.72704	3.62776	6198	1.03	150312	4.12341	0.927527	22541	0.71	235012	9.59143	6.07338
2020-04-29	1897	0.03	41400.1	4.58211	4.16422	6411	1.07	156150	4.10567	1.06486	24132	0.7	231702	10.4151	8.74358
2020-04-30	1718	0.03	41400.1	4.14975	4.16435	5841	1.15	167825	3.48042	1.15427	27326	0.71	235012	11.6275	9.555
2020-05-01	1993	0.04	55200.2	3.6105	3.21369	7099	1.2	175121	4.05376	1.35251	29917	0.73	241632	12.3812	6.81887
2020-05-02	2293	0.04	55200.2	4.15397	3.58814	7933	1.2	175121	4.53	1.08466	33955	0.76	251562	13.4977	6.07274
2020-05-03	2644	0.04	55200.2	4.78984	4.74255	9623	1.26	183877	5.23338	0.958023	29288	0.76	251562	11.6425	4.49672
2020-05-04	2553	0.05	69000.2	3.69999	2.81729	10633	1.29	188255	5.64818	0.831342	24972	0.79	261492	9.54981	5.19382
2020-05-05	3900	0.05	69000.2	5.65216	4.30831	10581	1.3	189715	5.57732	0.780589	22593	0.79	261492	8.64003	5.54154
2020-05-06	2958	0.05	69000.2	4.28694	2.52637	10102	1.28	186796	5.40804	0.765523	23841	0.81	268112	8.89217	8.99291
2020-05-07	3561	0.06	82800.3	4.30071	3.11005	10559	1.24	180959	5.83503	0.782023	24128	0.82	271422	8.88947	9.75216
2020-05-08	3390	0.06	82800.3	4.09419	2.90506	11231	1.25	182418	6.15674	0.748177	28369	0.89	294592	9.62992	7.89242
2020-05-09	3320	0.06	82800.3	4.00965	3.62205	10699	1.32	192633	5.55407	0.765738	26957	0.9	297902	9.04894	5.60151
2020-05-10	3277	0.06	82800.3	3.95772	2.59801	10817	1.3	189715	5.70172	0.850547	25612	0.94	311142	8.2316	6.30173
2020-05-11	4213	0.06	82800.3	5.08815	2.25564	11012	1.32	192633	5.71656	0.859758	20258	0.96	317763	6.3752	3.62326
2020-05-12	3604	0.06	82800.3	4.35264	3.36889	11656	1.32	192633	6.05087	0.862695	18117	0.99	327693	5.52866	6.38075
2020-05-13	3525	0.06	82800.3	4.25723	3.67687	10899	1.36	198471	5.49149	0.82361	22048	1.02	337623	6.53037	7.72406
2020-05-14	3722	0.06	82800.3	4.49515	2.43047	9974	1.4	204308	4.88184	0.88999	20782	1.06	350863	5.92311	8.4015
2020-05-15	3967	0.06	82800.3	4.79105	2.73109	10598	1.4	204308	5.18726	0.992581	27143	1.05	347553	7.80975	6.53207
2020-05-16	3970	0.06	82800.3	4.79467	2.50313	9200	1.44	210146	4.37792	0.95301	25508	1.09	360793	7.06998	6.5156
2020-05-17	4987	0.06	82800.3	6.02293	3.0105	9709	1.48	215983	4.49526	1.1087	24487	1.13	374033	6.54675	4.84339
2020-05-18	5242	0.07	96600.3	5.42648	2.8306	8926	1.51	220361	4.05063	1.05057	18873	1.17	387273	4.87331	4.28125
2020-05-19	4970	0.07	96600.3	5.14491	2.37244	9263	1.56	227658	4.06883	1.15393	21841	1.19	393893	5.5449	3.62163
2020-05-20	5611	0.07	96600.3	5.80847	2.34266	8764	1.62	236414	3.70706	1.17672	19970	1.21	400513	4.9861	7.85178
2020-05-21	5609	0.07	96600.3	5.8064	2.45725	8849	1.68	245170	3.60933	1.28937	23285	1.21	400513	5.81379	6.51922
2020-05-22	6088	0.07	96600.3	6.30226	2.17258	8894	1.71	249548	3.56404	1.34478	25434	1.24	410443	6.19671	4.96579
2020-05-23	6654	0.07	96600.3	6.88818	2.13117	9434	1.73	252467	3.73673	1.37171	24147	1.2	397203	6.07926	5.4044
2020-05-24	6977	0.07	96600.3	7.22254	2.19317	8599	1.76	256845	3.34794	1.37799	20568	1.16	383963	5.35677	5.0857
2020-05-25	6535	0.07	96600.3	6.76499	2.33863	8946	1.77	258304	3.46336	1.5118	19064	1.15	380653	5.00824	3.0776
2020-05-26	6387	0.07	96600.3	6.61178	2.90946	8915	1.8	262682	3.39384	1.55377	18910	1.18	390583	4.84148	2.62274
2020-05-27	6566	0.08	110400	5.94744	2.57221	8338	1.82	265601	3.1393	1.67134	18721	1.19	393893	4.75281	3.68059
2020-05-28	7466	0.08	110400	6.76266	2.42491	8371	1.83	267060	3.1345	1.93092	21817	1.2	397203	5.49265	8.15127
2020-05-29	7964	0.08	110400	7.21375	3.30711	8572	1.87	272897	3.14111	1.99498	25337	1.2	397203	6.37885	5.38571
2020-05-30	8380	0.08	110400	7.59056	2.46039	8572	1.92	280194	3.05931	1.92487	23297	1.24	410443	5.67606	4.81115
2020-05-31	8392	0.08	110400	7.60143	2.54479	8952	1.94	283113	3.16199	1.92487	19807	1.31	433613	4.56789	4.05632
2020-06-01	8171	0.08	110400	7.40124	2.60295	9268	1.95	284572	3.25682	1.9437	21086	1.32	436923	4.82602	3.03933
2020-06-02	8909	0.08	110400	8.06972	2.50567	9035	1.97	287491	3.14271	1.88822	20544	1.33	440234	4.66661	3.62326
2020-06-03	9304	0.08	110400	8.42751	2.68728	8863	1.99	290410	3.0519	1.95905	19699	1.37	453474	4.34402	5.0331
2020-06-04	9851	0.08	110400	8.92298	2.78512	8536	2.01	293328	2.91005	1.98578	21140	1.39	460094	4.59472	5.04594
2020-06-05	9887	0.09	124200	7.96052	3.02262	8831	2.03	296247	2.98096	1.92127	25178	1.39	460094	5.47236	4.90066
2020-06-06	9971	0.09	124200	8.02815	2.82293	8726	2.04	297706	2.93108	1.87974	22223	1.39	460094	4.8301	3.70164
2020-06-07	9983	0.09	124200	8.03782	2.39802	8855	2.05	299166	2.9599	1.8909	22302	1.37	453474	4.91804	3.19254
2020-06-08	9987	0.09	124200	8.04104	3.15017	8984	2.06	300625	2.98844	1.7956	18822	1.37	453474	4.15063	2.61928
2020-06-09	9985	0.09	124200	8.03943	2.68615	8985	2.08	303544	2.96004	1.75868	18665	1.42	470024	3.97108	2.65576
2020-06-10	9996	0.1	138000	7.24346	3.20007	8595	2.1	306462	2.80459	1.81413	20614	1.41	466714	4.41684	3.13641
2020-06-11	10956	0.1	138000	7.93911	3.53163	8404	2.12	309381	2.71639	1.90809	22883	1.43	473334	4.83443	0.701367
2020-06-12	11458	0.1	138000	8.30287	3.42938	8779	2.14	312300	2.81108	2.01095	25639	1.44	476644	5.37907	4.0955
2020-06-13	11929	0.1	138000	8.64418	2.56837	8987	2.11	307922	2.9186	1.78836	25540	1.46	483264	5.2849	4.35502
2020-06-14	11502	0.1	138000	8.33476	2.82223	8706	2.1	306462	2.84081	1.72471	19543	1.49	493194	3.96254	3.20336
2020-06-15	10667	0.1	138000	7.72969		8835	2.1	306462	2.8829	1.83781	19957	1.51	499814	3.99289	2.55195
2020-06-16	10974	0.1	138000	7.95215		8246	2.09	305003	2.70358	1.84493	23705	1.49	493194	4.80643	1.71003
2020-06-17	12881	0.1	138000	9.33403	2.60166	8248	2.07	302084	2.73036	1.94033	25559	1.52	503124	5.08006	2.67905
2020-06-18	13586	0.1	138000	9.8449	2.4736	7843	2.06	300625	2.6089	1.95199	27762	1.53	506434	5.48186	2.58587
2020-06-19	14516	0.11	151800	9.56255	2.47945	7790	2.04	297706	2.61667	2.05279	29909	1.54	509744	5.86745	3.32772
2020-06-20	15413	0.11	151800	10.1535	1.93735	7972	2.07	302084	2.639	2.15661	34158	1.56	516364	6.6151	3.1806
2020-06-21	14821	0.11	151800	9.76347	2.8104	7889	2.08	303544	2.59897	2.08229	25793	1.57	519674	4.9633	1.88437
2020-06-22	14933	0.12	165601	9.01748	2.30292	7728	2.08	303544	2.54593	2.01546	31390	1.62	536224	5.85389	1.72494
2020-06-23	16922	0.12	165601	10.2186	2.98984	7600	2.08	303544	2.50376	1.99275	34339	1.64	542844	6.32575	1.11695
2020-06-24	17296	0.12	165601	10.4444	2.51364	7425	2.08	303544	2.44611	1.94737	40949	1.65	546154	7.4977	1.54606
2020-06-25	18552	0.13	179401	10.3411	2.20511	7176	2.04	297706	2.41043	1.99327	45527	1.68	556084	8.18707	2.293
2020-06-26	19906	0.14	193201	10.3033	2.08699	7113	2	291869	2.43705	1.88127	42486	1.76	582565	7.29292	1.83506
2020-06-27	19459	0.14	193201	10.0719	2.05643	6800	2	291869	2.32981	1.88387	38673	1.81	599115	6.45502	6.20836
2020-06-28	18522	0.14	193201	9.58693	1.95818	6791	2	291869	2.32673	2.02941	41556	1.87	618975	6.71368	1.46205
2020-06-29	18653	0.15	207001	9.01108	2.27384	6719	2	291869	2.30206	2.01738	43880	1.88	622285	7.05143	1.13728
2020-06-30	19148	0.15	207001	9.25021	2.77169	6693	2	291869	2.29315	2.03899	52048	1.93	638835	8.14733	2.15812
2020-07-01	20903	0.15	207001	10.098	2.25448	6556	2.01	293328	2.23504	2.16644	53399	1.95	645455	8.27308	1.03476
2020-07-02	22771	0.15	207001	11.0004	1.72233	6760	2	291869	2.31611	2.33374	54442	1.98	655385	8.30687	1.2857
2020-07-03	24850	0.15	207001	12.0048	1.95414	6718	2	291869	2.30172	2.26331	45221	1.93	638835	7.07867	1.33589
2020-07-04	24248	0.16	220801	10.9818	2.53976	6632	1.96	286032	2.31863	2.23281	49093	1.93	638835	7.68477	1.17077
2020-07-05	22252	0.16	220801	10.0779	1.75497	6736	1.96	286032	2.35499	2.33715	49990	1.93	638835	7.82518	1.43454
2020-07-06	22752	0.16	220801	10.3043	2.10222	6736	1.93	281654	2.39159	2.39014	57473	1.94	642145	8.95016	0.31826
2020-07-07	24879	0.16	220801	11.2676	2.07046	6611	1.9	277275	2.38427	2.47922	58906	1.99	658695	8.94283	0.53793
2020-07-08	26506	0.17	234601	11.2983	1.92105	6368	1.87	272897	2.33348	2.43534	63004	1.98	655385	9.61328	0.692731
2020-07-09	27114	0.17	234601	11.5575	1.82629	6562	1.9	277275	2.3666	2.59108	66625	2.01	665315	10.014	1.85027
2020-07-10	28637	0.17	234601	12.2067	1.87313	6509	1.92	280194	2.32303	2.51448	63051	2.1	695106	9.07071	1.53334
2020-07-11	28701	0.18	248401	11.5543	1.95647	6635	1.95	284572	2.33157	2.58104	57258	2.16	714966	8.0085	1.35481
2020-07-12	28498	0.18	248401	11.4726	1.71792	6611	1.92	280194	2.35944	2.53203	58114	2.21	731516	7.94433	1.21151
2020-07-13	29429	0.19	262201	11.2238	1.91639	6615	1.92	280194	2.36086	2.46559	68518	2.27	751376	9.119	1.45264
2020-07-14	32695	0.2	276001	11.846	1.9621	6537	1.92	280194	2.33303	2.41875	67717	2.28	754686	8.97287	0.519023
2020-07-15	34956	0.21	289801	12.0621	1.88303	6248	1.93	281654	2.21833	2.12636	76930	2.28	754686	10.1936	0.594346
2020-07-16	34884	0.21	289801	12.0372	1.91722	6422	1.94	283113	2.26835	2.4968	71494	2.28	754686	9.47334	1.24195
2020-07-17	34956	0.22	303601	11.5138	1.94141	6428	1.93	281654	2.28224	2.46029	76930	2.31	764616	10.0613	1.40847
2020-07-18	34884	0.23	317401	10.9905	1.45172		1.92	280194		2.31798	71494	2.33	771236	9.27005	1.28905
2020-07-19	38902	0.23	317401	12.2564	1.67731	6109	1.92	280194	2.18027	2.13924	63749	2.35	777856	8.19547
2020-07-20	40425	0.24	331201	12.2056	1.61913		1.91	278735		2.30807	61796	2.36	781166	7.91074	1.30968
2020-07-21	37148	0.24	331201	11.2161	1.71296	5940	1.91	278735	2.13106		56750	2.35	777856	7.29569	0.78996
2020-07-22	37724	0.24	331201	11.3901	2.47802	5842	1.91	278735	2.0959	2.34007	72048	2.37	784476	9.18422	0.825826
2020-07-23	45720	0.24	331201	13.8043	1.55844	5862	1.9	277275	2.11414	2.32797	68848	2.37	784476	8.7763	1.65583
2020-07-24	49310	0.25	345001	14.2927	1.5564	5848	1.89	275816	2.12025	2.23473	63196	2.41	797716	7.92211	1.54219
2020-07-25	48916	0.26	358801	13.6332	1.42742	5811	1.87	272897	2.12937	2.30848	78427	2.42	801026	9.79081	1.54781
2020-07-26	48661	0.29	400201	12.1591	1.43873	5871	1.85	269979	2.17462	2.27155	65498	2.44	807646	8.10974
2020-07-27	49931	0.31	427801	11.6715	1.36821	5765	1.84	268519	2.14696	2.24834	55993	2.47	817577	6.84866	1.45229
2020-07-28	47703	0.31	427801	11.1507	1.55142	5635	1.83	267060	2.11001	2.28968	56243	2.46	814267	6.9072	0.982146
2020-07-29	48513	0.32	441601	10.9857	1.48288	5395	1.82	265601	2.03124	2.3425	61734	2.48	820887	7.52041	2.06953
2020-07-30	52123	0.35	483002	10.7915	1.43014	5475	1.82	265601	2.06136	2.40964	74985	2.47	817577	9.17162	1.99735
2020-07-31	55078	0.36	496802	11.0865	1.32902	5509	1.83	267060	2.06283	2.24658	68032	2.38	787786	8.63584	2.16188
2020-08-01	57118	0.36	496802	11.4971	1.5529	5482	1.85	269979	2.03053	2.21456	67023	2.36	781166	8.57986	1.78553
2020-08-02	54735	0.35	483002	11.3323	1.43915	5462	1.85	269979	2.02312	2.20722	58407	2.3	761306	7.67195	2.02225
2020-08-03	52972	0.36	496802	10.6626	1.59642	5427	1.83	267060	2.03213	2.21531	47511	2.28	754686	6.29547	1.93019
2020-08-04	52050	0.39	538202	9.6711	1.65555	5394	1.82	265601	2.03087	2.13746	45607	2.27	751376	6.0698	0.994002
2020-08-05	52509	0.41	565802	9.28046	1.62293	5159	1.82	265601	1.94239	2.11346	57525	2.19	724896	7.93562	1.47708
2020-08-06	56282	0.41	565802	9.9473	1.44604	5920	1.84	268519	2.20468	2.09343	52804	2.16	714966	7.38553	2.21242
2020-08-07	62538	0.42	579602	10.7898	1.52469	4551	1.82	265601	1.71347	1.90878	59755	2.18	721586	8.28107	2.4488
2020-08-08	61537	0.44	607202	10.1345	1.34293	5241	1.81	264141	1.98416	2.50494	58150	2.15	711656	8.17109	2.25785
2020-08-09	64399	0.45	621002	10.3702	1.63079	5212	1.82	265601	1.96234	2.15608	56221	2.15	711656	7.90003	2.1695
2020-08-10	62064	0.46	634802	9.77691	1.67308	5189	1.82	265601	1.95368	2.1297	46847	2.15	711656	6.58282	1.965
2020-08-11	53601	0.47	648602	8.26408	1.36322	5118	1.83	267060	1.91642	2.1006	49530	2.16	714966	6.9276	1.16337
2020-08-12	60963	0.49	676202	9.0155	1.41652	4945	1.84	268519	1.84158	2.16882	46813	2.08	688486	6.79942	1.3962
2020-08-13	66999	0.51	703802	9.51958	1.5684	5102	1.83	267060	1.91043	2.22447	55941	2.14	708346	7.89742	2.25584
2020-08-14	64553	0.54	745202	8.66248	1.50892	5057	1.84	268519	1.88329	2.11682	51094	2.17	718276	7.11342	2.65799
2020-08-15	65002	0.54	745202	8.72273	1.48626	5065	1.85	269979	1.87607	2.11588	64838	2.21	731516	8.86351	2.21406
2020-08-16	63490	0.56	772802	8.21555	1.6521	5061	1.86	271438	1.86451	2.07305	48085	2.23	738136	6.51438	2.17851
2020-08-17	57981	0.59	814203	7.1212	1.62063	4969	1.86	271438	1.83062	2.07469	42104	2.21	731516	5.75572	2.34182
2020-08-18	55079	0.59	814203	6.76478	1.69015	4892	1.87	272897	1.79261	2.07285	35056	2.16	714966	4.90317	2.79267
2020-08-19	64531	0.59	814203	7.92567	1.41482	4748	1.87	272897	1.73985	2.0646	44091	2.46	814267	5.41481	2.30659
2020-08-20	62898	0.6	828003	7.59635	1.43197	4945	1.87	272897	1.81204	2.04297	47529	2.47	817577	5.8134	2.14395
2020-08-21	63519	0.6	828003	7.67135	1.51923	4906	1.87	272897	1.79774	1.9818	46515	2.46	814267	5.7125	2.11975
2020-08-22	64215	0.61	841803	7.62827	1.49654	4879	1.87	272897	1.78785	1.99755	44378	2.48	820887	5.40611	2.20605
2020-08-23	65036	0.62	855603	7.60119	1.45458	4859	1.87	272897	1.78052	2.00861	43848	2.47	817577	5.36317	2.19394
2020-08-24	65526	0.61	841803	7.78401	1.4376	4842	1.87	272897	1.77429	2.05804	42763	2.47	817577	5.23046	2.24961
2020-08-25	66753	0.61	841803	7.92977	1.38421	4821	1.87	272897	1.7666	2.02396	43226	2.47	817577	5.28709	2.19312
2020-08-26	66743	0.61	841803	7.92858	1.41438	4814	1.87	272897	1.76403	2.03277	41719	2.48	820887	5.08219	2.23639
2020-08-27	67615	0.61	841803	8.03217	1.41093	4792	1.9	277275	1.72825	2.07727	41719	2.49	824197	5.06178	2.24598
2020-08-28	68811	0.62	855603	8.0424	1.40239	4781	1.91	278735	1.71525	2.14942	41991	2.5	827507	5.0744	2.18142
2020-08-29	69753	0.61	841803	8.28615	1.39062	4775	1.94	283113	1.68661	2.11253	41959	2.5	827507	5.07053	2.17832
2020-08-30	71113	0.64	883203	8.05172	1.38512	4778	1.96	286032	1.67045	2.11518	41925	2.53	837437	5.00635	2.12999
2020-08-31	73556	0.66	910803	8.07595	1.33912	4797	1.98	288950	1.66015	2.17664	42079	2.54	840747	5.00496	2.17448
2020-09-01	74834	0.67	924603	8.09364	1.33095	4832	2	291869	1.65554	2.16802	41443	2.54	840747	4.92931	2.14994
2020-09-02	76435	0.69	952203	8.02717	1.28998	4837	2.02	294788	1.64084	2.13162	42374	2.69	890397	4.759	2.04371
2020-09-03	77596	0.72	993603	7.80956	1.27842	4876	2.02	294788	1.65407	2.17077	41790	2.54	840747	4.97058	2.29959
2020-09-04	78464	0.74	1.0212e+06	7.68349	1.27702	4917	2.02	294788	1.66798	2.1329	40410	2.57	850677	4.75034	2.13066
2020-09-05	79886	0.76	1.0488e+06	7.61687	1.27432	4957	2.02	294788	1.68155	2.09477	40612	2.58	853987	4.75558	2.05112
2020-09-06	81582	0.76	1.0488e+06	7.77858	1.2564	4995	2.02	294788	1.69444	1.99718	40612	2.55	844057	4.81152	2.08559
2020-09-07	83338	0.75	1.035e+06	8.05196	1.28393	5025	2.02	294788	1.70462	1.96196	39294	2.45	810956	4.84539	2.04102
2020-09-08	84179	0.76	1.0488e+06	8.02619	1.28298	5053	2.07	302084	1.67271	1.95025	38522	2.34	774546	4.97349	1.85089
2020-09-09	85801	0.77	1.0626e+06	8.0746	1.27971	5106	2.05	299166	1.70675	2.05818	36020	2.31	764616	4.71086	2.0322
2020-09-10	87494	0.77	1.0626e+06	8.23393	1.27323	5144	2.05	299166	1.71945	1.99765	35045	2.32	767926	4.56359	2.02311
2020-09-11	89381	0.77	1.0626e+06	8.41151	1.26425	5196	2.07	302084	1.72005	2.00233	35224	2.33	771236	4.56721	2.1122
2020-09-12	90972	0.77	1.0626e+06	8.56124	1.24984	5252	2.09	305003	1.72195	2.05928	34794	2.35	777856	4.47306	2.11243
2020-09-13	91506	0.77	1.0626e+06	8.61149	1.26112	5293	2.1	306462	1.72713	2.05636	34320	2.38	787786	4.35651	2.12995
2020-09-14	91687	0.8	1.104e+06	8.30496	1.24663	5329	2.12	309381	1.72247	2.116	34794	2.5	827507	4.20468	2.50905
2020-09-15	92830	0.79	1.0902e+06	8.51492	1.25821	5375	2.09	305003	1.76228	2.06418	36307	2.64	873847	4.15485	2.32737
2020-09-16	92890	0.79	1.0902e+06	8.52043	1.25094	5437	2.13	310840	1.74913	2.10233	39785	2.72	900327	4.41895	2.10883
2020-09-17	93198	0.79	1.0902e+06	8.54868	1.24144	5501	2.14	312300	1.76145	2.15192	38738	2.76	913567	4.2403	2.06257
2020-09-18	93180	0.77	1.0626e+06	8.76903	1.2492	5558	2.14	312300	1.7797	2.1996	39604	2.81	930117	4.25796	2.01747
2020-09-19	92575	0.75	1.035e+06	8.94442	1.2606	5616	2.15	313759	1.78991	2.14106	39911	2.84	940048	4.24564	2.00195
2020-09-20	92323	0.77	1.0626e+06	8.68838	1.26296	5698	2.15	313759	1.81604	2.15456	39836	2.84	940048	4.23766	1.95552
2020-09-21	91593	0.74	1.0212e+06	8.96913	1.27302	5798	2.17	316678	1.83088	2.1411	40690	2.86	946668	4.29824	1.82109
2020-09-22	90346	0.73	1.0074e+06	8.96821	1.25739	5896	2.16	315218	1.87045	2.13867	43306	2.86	946668	4.57457	1.74803
2020-09-23	89378	0.73	1.0074e+06	8.87212	1.27101	5994	2.16	315218	1.90154	2.10312	41425	2.87	949978	4.36063	1.84671
2020-09-24	87752	0.71	979803	8.95609	1.28886	6103	2.19	319596	1.9096	2.01869	43330	2.89	956598	4.5296	1.76783
2020-09-25	86270	0.71	979803	8.80483	1.2855	6222	2.22	323975	1.92052	2.03179	43422	2.91	963218	4.50802	1.76408
2020-09-26	85131	0.76	1.0488e+06	8.11697	1.30035	6222	2.26	329812	1.88653	2.04114	44109	2.87	949978	4.64316	1.74568
2020-09-27	84559	0.78	1.0764e+06	7.8557	1.29377	6617	2.31	337109	1.96287	2.02507	44833	2.85	943358	4.75249	1.73087
2020-09-28	83874	0.78	1.0764e+06	7.79206	1.25784	6862	2.31	337109	2.03555	1.90419	44318	2.82	933427	4.74788	1.71714
2020-09-29	83232	0.81	1.1178e+06	7.44603	1.28316	7139	2.35	342946	2.08167	1.89449	41439	2.81	930117	4.45524	1.80024
2020-09-30	82821	0.82	1.1316e+06	7.31891	1.29919	7427	2.38	347324	2.13835	1.86301	42112	2.82	933427	4.51154	1.71685
2020-10-01	82866	0.85	1.173e+06	7.06443	1.29003	7720	2.41	351702	2.19504	1.93887	42691	2.83	936738	4.55741	1.67014
2020-10-02	82214	0.81	1.1178e+06	7.35496	1.29662	8056	2.45	357539	2.25318	1.87824	42771	2.85	943358	4.53391	1.66468
2020-10-03	81373	0.81	1.1178e+06	7.27972	1.27807	8370	2.45	357539	2.341	1.81231	42693	2.85	943358	4.52564	1.6443
2020-10-04	79548	0.79	1.0902e+06	7.29662	1.28224	8704	2.5	364836	2.38573	1.8399	43449	2.86	946668	4.58968	1.6387
2020-10-05	78444	0.8	1.104e+06	7.10541	1.32069	9080	2.54	370674	2.44959	1.81526	43257	2.87	949978	4.55348	1.69221
2020-10-06	77113	0.83	1.1454e+06	6.73239	1.30717	9473	2.58	376511	2.516	1.69604	44358	2.92	966528	4.58942	1.58258
2020-10-07	75909	0.82	1.1316e+06	6.70809	1.28838	9957	2.62	382348	2.60417	1.69957	44364	3	993008	4.46764	1.57786
2020-10-08	74724	0.84	1.1592e+06	6.44615	1.28473	10333	2.67	389645	2.6519	1.63704	45250	3	993008	4.55686	1.58232
2020-10-09	73154	0.82	1.1316e+06	6.46463	1.28359	10697	2.99	436344	2.45151	1.59683	46968	3.13	1.03604e+06	4.53342	1.53722
2020-10-10	72268	0.81	1.1178e+06	6.46518	1.29518	11085	2.77	404238	2.74219	1.57053	47484	3.21	1.06252e+06	4.469	1.50366
2020-10-11	72092	0.82	1.1316e+06	6.37078	1.2817	11511	3.03	442181	2.60323	1.56067	48000	3.25	1.07576e+06	4.46197	1.51042
2020-10-12	70960	0.82	1.1316e+06	6.27075	1.2655	11959	2.96	431966	2.7685	1.5116	49242	3.3	1.09231e+06	4.50807	1.43577
2020-10-13	70114	0.81	1.1178e+06	6.27248	1.22943	12345	3.03	442181	2.79184	1.52187	49378	3.23	1.06914e+06	4.61848	1.45814
2020-10-14	68894	0.81	1.1178e+06	6.16334	1.19023	12667	3.06	446559	2.83658	1.52288	50729	3.16	1.04597e+06	4.84996	1.43902
2020-10-15	67348	0.8	1.104e+06	6.10034	1.20271	13113	3.06	446559	2.93645	1.4368	52329	3.1	1.02611e+06	5.09975	1.3568
2020-10-16	66331	0.79	1.0902e+06	6.08428	1.20155	13435	2.94	429047	3.13136	1.43369	53327	3.08	1.01949e+06	5.23076	1.31453
2020-10-17	64751	0.76	1.0488e+06	6.1738	1.25712	13867	3	437803	3.1674	1.50354	55066	3.08	1.01949e+06	5.40134	1.30389
2020-10-18	62963	0.76	1.0488e+06	6.00332	1.23882	14164	3.04	443641	3.19267	1.35574	55400	3.09	1.0228e+06	5.41651	1.29783
2020-10-19	61390	0.75	1.035e+06	5.93138	1.24287	14373	3.24	472828	3.0398	1.42615	56007	3.12	1.03273e+06	5.42321	1.31591
2020-10-20	60169	0.74	1.0212e+06	5.89197	1.26477	14715	3.19	465531	3.16091	1.43324	58651	3.3	1.09231e+06	5.36945	1.29069
2020-10-21	58816	0.74	1.0212e+06	5.75948	1.29897	15065	3.33	485962	3.10004	1.48148	59512	3.29	1.089e+06	5.46484	1.30898
2020-10-22	57121	0.77	1.0626e+06	5.37557	1.28674	15275	3.38	493258	3.09675	1.48689	60026	3.4	1.12541e+06	5.33371	1.30443
2020-10-23	55834	0.77	1.0626e+06	5.25445	1.26804	15591	3.38	493258	3.16082	1.50573	61207	3.4	1.12541e+06	5.43864
2020-10-24	54571	0.81	1.1178e+06	4.88198	1.17828	15904	3.42	499096	3.18656	1.50087	63361	3.42	1.13203e+06	5.59712	1.28944
2020-10-25	52894	0.84	1.1592e+06	4.56296	1.18917	16133	3.42	499096	3.23245	1.54049	67139	3.48	1.15189e+06	5.8286	1.20645
2020-10-26	51383	0.86	1.1868e+06	4.32953	1.19689	16363	3.45	503474	3.25002	1.52482	68795	3.49	1.1552e+06	5.95525	1.18323
2020-10-27	49909	0.87	1.2006e+06	4.15699	1.17213	16558	3.47	506393	3.2698	1.54617	69967	3.52	1.16513e+06	6.00508	1.17055
2020-10-28	48459	0.86	1.1868e+06	4.08315	1.15355	16591	3.48	507852	3.2669	1.54608	72335	3.55	1.17506e+06	6.15586	1.10182
2020-10-29	47608	0.86	1.1868e+06	4.01145	1.13636	16663	3.52	513689	3.24379	1.57917	74534	3.54	1.17175e+06	6.36092	1.09212
2020-10-30	46791	0.82	1.1316e+06	4.13493	1.12415	16712	3.56	519527	3.21677	1.62036	76830	3.52	1.16513e+06	6.59412	1.0738
2020-10-31	46062	0.79	1.0902e+06	4.22508	1.10937	17047	3.57	520986	3.27206	1.68143	79108	3.54	1.17175e+06	6.75127	1.03403
2020-11-01	45610	0.76	1.0488e+06	4.34877	1.12475	17278	3.64	531201	3.25263	1.70705	78519	3.61	1.19492e+06	6.57107	1.04688
2020-11-02	45622	0.75	1.035e+06	4.40791	1.12665	17557	3.65	532661	3.29609	1.7421	81599	3.63	1.20154e+06	6.7912	1.01472
2020-11-03	45884	0.76	1.0488e+06	4.37489	1.12022	17687	3.64	531201	3.32962	1.74289	83817	3.63	1.20154e+06	6.9758	1.09047
2020-11-04	46222	0.78	1.0764e+06	4.29411	1.17044	17987	3.65	532661	3.37682	1.73574	86332	3.68	1.21809e+06	7.08749	1.0726
2020-11-05	46269	0.78	1.0764e+06	4.29848	1.20167	18496	3.65	532661	3.47238	1.72347	89780	3.68	1.21809e+06	7.37056	1.06037
2020-11-06	46124	0.8	1.104e+06	4.17789	1.21412	18737	3.57	520986	3.59645	1.70307	94681	3.8	1.25781e+06	7.52745	1.03083
2020-11-07	46423	0.8	1.104e+06	4.20497	1.2343	19066	3.58	522445	3.64938	1.71319	98874	3.88	1.28429e+06	7.69873	1.00431
2020-11-08	46238	0.81	1.1178e+06	4.13651	1.23708	19388	3.59	523905	3.70067	1.63118	104942	3.91	1.29422e+06	8.10851	0.955766
2020-11-09	46301	0.81	1.1178e+06	4.14214	1.22244	19650	3.58	522445	3.76116	1.6144	109184	3.98	1.31739e+06	8.2879	0.938782
2020-11-10	46301	0.81	1.1178e+06	4.14214	1.22244	20156	3.6	525364	3.83658	1.61832	117043	4.04	1.33725e+06	8.75251	0.852678
2020-11-11	46019	0.8	1.104e+06	4.16837	1.18212	20489	3.62	528283	3.87842	1.60746	124835	4.09	1.3538e+06	9.22108	0.836304
2020-11-12	45690	0.8	1.104e+06	4.13857	1.15124	20500	3.73	544336	3.76606	1.5911	130663	4.15	1.37366e+06	9.51203	0.805125
2020-11-13	45295	0.79	1.0902e+06	4.15473	1.14361	20815	3.78	551632	3.77335	1.59512	135125	4.24	1.40345e+06	9.62805	0.774838
2020-11-14	44485	0.78	1.0764e+06	4.13274	1.12847	21015	3.81	556010	3.77961	1.59981	142867	4.29	1.42e+06	10.061	0.758048
2020-11-15		0.73	1.0074e+06				3.82	557470		1.67975		4.37	1.44648e+06

## Sheet: Figure 3
Data from : https://en.wikipedia.org/wiki/COVID-19_testing
		tests		positives	% pos	cases	deaths	CFR
Afghanistan	2020-08-11	97199		36542	41.3	37596	1375	3.6573		91 countries with test data and deaths above 100
Albania	2020-08-07	44881		6151	13.7	7260	225	3.09917
Algeria	2020-08-05	79981		32499	40.6	38133	1360	3.56646
Argentina	2020-07-29	675011		173355	25.7	282437	5565	1.97035
Armenia	2020-08-13	180497		41023	22.7	41663	818	1.96337
Australia	2020-08-20	5508831		24236	0.44	23035	379	1.64532
Austria	2020-08-22	1087155		24918	2.3	23211	728	3.13644
Azerbaijan	2020-08-13	812033		33915	4.2	34107	506	1.48357
Bahrain	2020-08-12	933762		45264	4.8	46430	170	0.366143
Bangladesh	2020-08-12	1328757		271881	20.5	274525	3625	1.32046
Barbados	2020-07-30	10881		152	1.4	148	7
Belarus	2020-07-23	1219705		66688	5.5	69424	607	0.874337
Belgium	2020-08-07	1346748		72016	5.3	77776	9935	12.7739
Bhutan	2020-08-07	55354		113	0.2	133	0
Bolivia	2020-07-29	144153		73534	51	97950	3939	4.02144
Bosnia and Herzegovina	2020-08-17	163147		16111	9.9	15802	466	2.94899
Brazil	2020-08-13	13464336		3224876	24	3275520	106523	3.25209
Bulgaria	2020-08-15	330785		14243	4.3	14333	495	3.45357
Burkina Faso	2020-07-29	17400		1213	7	1240	54
Cameroon	2020-07-16	135000		16157	12	18469	401	2.17121
Canada	2020-08-12	4581083		120844	2.6	121652	9020	7.41459
Chile	2020-08-12	1908964		378168	19.8	383902	10395	2.70772
China	2020-07-31	160000000		91418	0.06	89761	4710	5.24727
Colombia	2020-08-13	2063332		433805	21	445111	14492	3.25582
Costa Rica	2020-08-07	102257		22081	21.6	26931	281	1.04341
Croatia	2020-08-05	124383		5376	4.3	6420	165	2.57009
Cuba	2020-07-28	256996		2588	1	3292	88
Cyprus[c]	2020-08-12	243405		1351	0.56	1332	20
Czechia	2020-08-22	834547		21680	2.6	19891	395	1.98582
Denmark	2020-08-12	1874640		15419	0.82	15483	621	4.01085
DR Congo	2020-07-28	44051		8873	20.1	9637	239	2.48002
Ecuador	2020-08-13	276491		98343	35.6	100688	6065	6.02356
Egypt	2020-07-29	449968		93356	20.7	96336	5141	5.33653
El Salvador	2020-08-14	273509		22314	8.2	22619	603	2.6659
Estonia	2020-08-14	132270		2177	1.6	2184	63
Ethiopia	2020-07-19	331366		10207	3.1	28894	509	1.76161
Finland	2020-08-13	453576		7700	1.7	7720	333	4.31347
France[d]	2020-07-21	3510897		177338	5.1	202118	30277	14.9799
Germany	2020-07-29	8006135		206926	2.6	223453	9231	4.13107
Ghana	2020-08-19	428695		42993	10	42210	231	0.547264
Greece	2020-07-19	410766		4007	0.98	6858	226	3.29542
Grenada	2020-06-18	5465		24	0.44	24	0
Guinea	2020-08-19	72510		8715	12	8343	50
Hungary	2020-08-08	358437		4653	1.3	4877	607	12.4462
Iceland	2020-08-12	168233		1972	1.2	1999	10
India	2020-08-23	35292220		3044940	8.6	2589682	49980	1.92997
Indonesia	2020-08-23	1157184		153535	13.3	137468	6071	4.4163
Iran	2020-08-07	2637575		322567	12.2	341070	19492	5.71496
Iraq	2020-07-20	809522		94693	11.7	172583	5785	3.35201
Ireland	2020-08-14	699036		26995	3.9	27191	1774	6.52422
Israel	2020-08-23	2224601		102380	4.6	88488	640	0.723262
Italy	2020-08-22	7940266		258136	3.3	253438	35392	13.9648
Ivory Coast	2020-07-28	87683		15713	17.9
Jamaica	2020-07-28	37210		855	2.3	1082	14
Japan	2020-08-16	1164029		53557	4.6	54714	1088	1.98852
Kazakhstan	2020-08-13	2252153		101372	4.5	119781	1433	1.19635
Kenya	2020-07-18	238163		12750	5.4	29849	472	1.58129
Kosovo	2020-06-09	17199		1269	7.4	11232	380	3.38319
Kyrgyzstan	2020-08-18	322486		18125	5.6	41856	1495	3.57177
Latvia	2020-08-14	222531		1308	0.59	1315	32
Lebanon	2020-08-14	401016		8045	2	8442	97
Libya	2020-08-05	55899		4224	7.6	7327	139	1.89709
Lithuania	2020-08-13	565782		2330	0.41	2386	81
Luxembourg[e]	2020-08-20	583966		6252	1.1	7439	123	1.65345
Madagascar	2020-08-05	45634		12222	26.8	13724	166	1.20956
Malawi	2020-08-07	34051		4575	13.4	5026	157	3.12376
Malaysia	2020-07-26	937645		8897	0.95	9175	125	1.3624
Maldives	2020-08-07	86651		4769	5.5	5679	22
Malta	2020-08-12	147411		1190	0.81	1247	9
Mauritius	2020-06-02	120358		344	0.29	6693	157	2.34573
Mexico	2020-08-13	1058970		505751	47.8	511369	55908	10.933
Moldova[f]	2020-07-13	118335		19382	16.4	29905	895	2.99281
Montenegro	2020-08-04	24469		3361	13.7	4013	75
Morocco	2020-08-07	1405159		21548	1.5	41017	632	1.54082
Mozambique	2020-08-14	75430		2708	3.6	2791	19
Myanmar	2020-07-31	112381		376	0.33	374	6
Nepal	2020-08-21	892301		30483	3.4	26019	102	0.392021
Netherlands	2020-08-04	668851		55955	8.4	62437	6160	9.86594
New Zealand	2020-08-18	639415		1299	0.2	1271	22
Nigeria	2020-07-30	276053		42689	15.5	48770	974	1.99713
North Korea	2020-06-19	922		0	0
North Macedonia	2020-08-08	113537		11771	10.4	12546	535	4.26431
Northern Cyprus[g]	2020-07-19	56268		1702	3	1332	20
Norway	2020-08-14	530446		9850	1.9	9850	261	2.64975
Oman	2020-07-01	194945		41194	21.1	82924	562	0.677729
Pakistan	2020-08-14	2229409		287300	12.9	288717	6168	2.13635
Palestine	2020-08-09	216765		18654	8.6	21554	119	0.552102
Panama	2020-08-13	261350		78446	30	79404	1734	2.18377
Paraguay	2020-08-13	146284		8389	5.7	9022	108	1.19707
Peru	2020-08-22	2950589		585236	19.8	516296	25856	5.00798
Philippines	2020-08-22	2305686		187249	8.1	157918	2600	1.64642
Poland	2020-07-25	2095222		42622	2	56090	1869	3.33214
Portugal	2020-08-13	1783267		53548	3	53981	1775	3.28819
Qatar	2020-08-12	533995		113938	21.3	114809	192	0.167234
Romania	2020-08-14	1478056		68046	4.6	69374	2954	4.25808
Russia	2020-08-22	34447560		956749	2.8	922853	15685	1.69962
Rwanda	2020-07-29	255959		1963	0.77	2352	8
Saint Lucia	2020-08-14	4521		25	0.55	25	0
Saudi Arabia	2020-08-12	4138204		295902	7.2	297315	3369	1.13314
Senegal	2020-07-26	104061		9681	9.3	12032	251	2.0861
Serbia	2020-08-04	703246		26738	3.8	29471	670	2.27342
Singapore	2020-08-03	1474372		53051	3.6	55661	27
Slovakia	2020-08-19	300586		3022	1.01	2855	31
Slovenia	2020-08-12	140942		2332	1.7	2401	124	5.16451
South Africa	2020-08-14	3351111		579140	17.3	583653	11677	2.00068
South Korea	2020-08-16	1681787		15318	0.91	15318	305	1.99112
Spain	2020-08-13	7472031		337334	4.5	342813	28617	8.3477
Sri Lanka	2020-08-14	182681		2886	1.6	2886	11
Sudan	2020-07-23	31805		11302	35.5	2489	47
Sweden	2020-07-05	597850		72693	12.2	84294	5783	6.86051
Switzerland[h]	2020-08-07	854885		37169	4.4	37831	1714	4.53068
Taiwan[i]	2020-08-19	85128		486	0.57
Tanzania	2020-06-06	2680		509	19	509	21
Thailand	2020-07-28	749213		3381	0.48	3377	58
Trinidad and Tobago	2020-08-14	12937		426	3.3	474	10
Tunisia	2020-08-05	102041		1656	1.6	2023	54
Turkey	2020-08-09	5263816		240804	4.6	248117	5955	2.40008
Uganda	2020-08-14	312792		1560	0.5	1385	12
Ukraine	2020-07-29	998299		67597	6.8	91356	2070	2.26586
United Arab Emirates	2020-08-12	5700145		63212	1.1	64102	361	0.563165
United Kingdom	2020-08-21	15177265		323313	2.1	316371	41358	13.0726
United States	2020-08-21	70336781		5593318	8	5258565	167201	3.17959
Uruguay	2020-07-30	110951		1243	1.1	1421	38
Uzbekistan	2020-07-14	1400000		13872	0.99	34944	228	0.652473
Venezuela	2020-07-17	1420066		11891	0.84	31381	266	0.847647
Vietnam	2020-08-15	723596		989	0.14	951	23
Zimbabwe	2020-07-30	129899		3092	2.4	5176	130	2.51159

## Sheet: Figure 4
Data extracted from : https://ourworldindata.org/mortality-risk-covid
date	critical cases	total deaths	daily deaths	total cases	daily cases	critical/total cases	ND/NC	death/critical	ND/NR
2020-01-26	0	80	24	2800	2800	0	0.857143	#DIV/0!
2020-01-27	0	106	26	4581	1781	0	1.45985	#DIV/0!
2020-01-28	0	132	26	6058	1477	0	1.76032	#DIV/0!
2020-01-29	0	170	38	7813	1755	0	2.16524	#DIV/0!
2020-01-30	0	213	43	9823	2010	0	2.1393	#DIV/0!
2020-01-31	0	259	46	11950	2127	0	2.16267	#DIV/0!
2020-02-01	0	304	45	14553	2603	0	1.72877	#DIV/0!
2020-02-02	2298	362	58	17391	2838	80.9725	2.04369	2.52393
2020-02-03	2790	426	64	20630	3239	86.1377	1.97592	2.29391
2020-02-04	3223	492	66	24545	3915	82.3244	1.68582	2.04778
2020-02-05	3863	565	73	28266	3721	103.816	1.96184	1.88972
2020-02-06	4825	638	73	34876	6610	72.9955	1.10439	1.51295
2020-02-07	6106	724	86	37552	2676	228.176	3.21375	1.40845
2020-02-08	6196	813	89	40553	3001	206.465	2.96568	1.43641
2020-02-09	6494	910	97	43099	2546	255.067	3.8099	1.49369
2020-02-10	7344	1018	108	43099		#DIV/0!	#DIV/0!	1.47059
2020-02-11	8216	1115	97	45134	2035	403.735	4.76658	1.18062
2020-02-12	8049	1261	146	59287	14153	56.8713	1.03158	1.81389
2020-02-13	10228	1383	122	64438	5151	198.563	2.36847	1.1928
2020-02-14	11082	1526	143	67100	2662	416.304	5.3719	1.29038
2020-02-15	11299	1669	143	69197	2097	538.817	6.81927	1.2656
2020-02-16	10670	1775	106	71329	2132	500.469	4.97186	0.99344
2020-02-17	11795	1873	98	73332	2003	588.867	4.89266	0.830861
2020-02-18	12057	2009	136	75184	1852	651.026	7.34341	1.12798
2020-02-19	11911	2126	117	75700	516	2308.33	22.6744	0.982285
2020-02-20	11681	2247	121	76677	977	1195.6	12.3849	1.03587
2020-02-21	11531	2360	113	77673	996	1157.73	11.3454	0.979967
2020-02-22	11553	2460	100	78651	978	1181.29	10.2249	0.865576
2020-02-23	10007	2618	158	79205	554	1806.32	28.5199	1.57889
2020-02-24	9216	2699	81	80090	885	1041.36	9.15254	0.878906
2020-02-25	8839	2763	0	80828	738	1197.7	0	0
2020-02-26	8469	2800	0	81820	992	853.73	0	0
2020-02-27	8100	2858	0	83108	1288	628.882	0	0
2020-02-28	7816	2923	0	84617	1509	517.959	0	0
2020-02-29	7570	2977	0	86606	1989	380.593	0	0
2020-03-01	7375	3050	73	88586	1980	372.475	3.68687	0.989831
2020-03-02	7094	3117	67	90448	1862	380.988	3.59828	0.94446
2020-03-03	6771	3202	85	93018	2570	263.463	3.30739	1.25535
2020-03-04	6420	3285	83	95324	2306	278.404	3.59931	1.29283
2020-03-05	6272	3387	102	98414	3090	202.977	3.30097	1.62628
2020-03-06	6401	3493	106	102051	3637	175.997	2.91449	1.65599
2020-03-07	6035	3598	105	106103	4052	148.939	2.59131	1.73985
2020-03-08	5977	3826	228	109997	3894	153.493	5.85516	3.81462
2020-03-09	5772	4023	197	114431	4434	130.176	4.44294	3.41303
2020-03-10	5748	4297	274	119075	4644	123.773	5.90009	4.76688
2020-03-11	5707	4627	330	126307	7232	78.9132	4.56305	5.78237
2020-03-12	5948	4980	353	134565	8258	72.0271	4.27464	5.93477
2020-03-13	6072	5428	448	145477	10912	55.6452	4.10557	7.37813
2020-03-14	5642	5842	414	156436	10959	51.4828	3.77772	7.33782
2020-03-15	5911	6533	691	169452	13016	45.4133	5.30885	11.6901
2020-03-16	6151	7178	645	182385	12933	47.5605	4.98724	10.4861
2020-03-17	6403	7997	819	198148	15763	40.6204	5.19571	12.7909
2020-03-18	6747	8983	986	218832	20684	32.6194	4.76697	14.6139
2020-03-19	7320	10083	1100	244971	26139	28.0041	4.20827	15.0273
2020-03-20	7848	11466	1383	275635	30664	25.5935	4.51017	17.6223
2020-03-21	9237	13114	1648	305040	29405	31.413	5.60449	17.8413
2020-03-22	9768	14762	1648	337473	32433	30.1175	5.08124	16.8714
2020-03-23	12064	16699	1937	379016	41543	29.0398	4.66264	16.056
2020-03-24	13097	19193	2494	422806	43790	29.9087	5.69536	19.0425
2020-03-25	14794	21785	2592	471421	48615	30.4309	5.33169	17.5206
2020-03-26	19360	24750	2965	532352	60931	31.7736	4.86616	15.3151
2020-03-27	23524	28226	3476	596994	64642	36.3912	5.37731	14.7764
2020-03-28	25209	31936	3710	663747	66753	37.7646	5.5578	14.717
2020-03-29	26791	35315	3379	724204	60457	44.3141	5.5891	12.6124
2020-03-30	29498	39490	4175	788426	64222	45.9313	6.50089	14.1535
2020-03-31	32943	44226	4736	862419	73993	44.5218	6.40061	14.3763
2020-04-01	35448	49425	5199	939527	77108	45.9719	6.74249	14.6666
2020-04-02	37657	55724	6299	1019690	80163	46.9755	7.85774	16.7273
2020-04-03	39399	61734	6010	1103731	84041	46.8807	7.15127	15.2542
2020-04-04	42296	67886	6152	1185285	81554	51.8626	7.54347	14.5451
2020-04-05	45597	72960	5074	1255711	70426	64.7446	7.20473	11.1279
2020-04-06	47470	78597	5637	1328738	73027	65.0034	7.71906	11.8749
2020-04-07	47904	86497	7900	1407072	78334	61.1535	10.085	16.4913
2020-04-08	48079	93295	6798	1491493	84421	56.9515	8.0525	14.1392
2020-04-09	49126	100975	7680	1576688	85195	57.663	9.01461	15.6333
2020-04-10	49828	108378	7403	1668221	91533	54.4372	8.08779	14.8571
2020-04-11	50592	114713	6335	1747433	79212	63.8691	7.99753	12.5217
2020-04-12	50758	120391	5678	1818914	71481	71.0091	7.94337	11.1864
2020-04-13	51742	126114	5723	1888948	70034	73.8813	8.17175	11.0606
2020-04-14	51609	133558	7444	1962011	73063	70.6363	10.1885	14.4238
2020-04-15	51142	141751	8193	2044760	82749	61.8038	9.90103	16.0201	26.1659
2020-04-16	56596	148790	7039	2125521	80761	70.0784	8.71584	12.4373	19.0649
2020-04-17	56963	157275	8485	2210449	84928	67.0721	9.99082	14.8956	34.6577
2020-04-18	55265	163963	6688	2290727	80278	68.842	8.33105	12.1017	25.148
2020-04-19	54225	168939	4976	2365873	75146	72.1595	6.62178	9.17658	16.096
2020-04-20	56763	174500	5561	2439318	73445	77.2864	7.57165	9.79687	26.7647
2020-04-21	57254	181726	7226	2514735	75417	75.9166	9.58139	12.621	16.0834
2020-04-22	56686	188379	6653	2594793	80058	70.8062	8.31023	11.7366	23.8252
2020-04-23	58696	195174	6768	2679631	84838	69.186	7.97756	11.5306	22.8751
2020-04-24	58531	201556	6409	2781318	101687	57.56	6.30267	10.9498	9.56441
2020-04-25	58202	207734	6178	2871559	90241	64.4962	6.84611	10.6148	15.3844
2020-04-26	57600	211578	3844	2944807	73248	78.637	5.24792	6.67361	15.8312
2020-04-27	56297	216099	4521	3014148	69341	81.1886	6.51995	8.03062	10.1661
2020-04-28	56965	222854	6755	3089582	75434	75.5163	8.95485	11.8582	20.6589
2020-04-29	59817	229475	6621	3169434	79852	74.9098	8.29159	11.0688	14.0181
2020-04-30	50956	235296	5821	3255273	85839	59.3623	6.7813	11.4236	14.8059
2020-05-01	51355	240980	5684	3350246	94973	54.0733	5.98486	11.0681	13.5978
2020-05-02	50860	246292	5312	3433138	82892	61.3569	6.40834	10.4444	12.6544
2020-05-03	50040	249859	2567	3515295	82157	60.9078	3.12451	5.1299	10.4251
2020-05-04	49639	253963	4104	3594717	79422	62.5003	5.16733	8.26769	9.88884
2020-05-05	49256	259790	5827	3676151	81434	60.4858	7.15549	11.83	12.515
2020-05-06	48214	266632	6842	3772030	95879	50.2863	7.13608	14.1909	11.538
2020-05-07	48962	272246	5614	3868353	96323	50.8311	5.82831	11.466	13.3033
2020-05-08	48703	277747	5501	3964942	96589	50.4229	5.69527	11.295	13.0494
2020-05-09	47685	282046	4299	4054279	89337	53.3765	4.81212	9.01541	7.80361
2020-05-10	47040	286088	4042	4134483	80204	58.6504	5.03965	8.59269	8.67397
2020-05-11	46939	289587	3499	4209136	74653	62.8762	4.68702	7.45436	9.16497
2020-05-12	46340	295129	5542	4294864	85728	54.0547	6.46463	11.9594	7.787
2020-05-13	45921	300357	5228	4384628	89764	51.1575	5.82416	11.3848	8.79273
2020-05-14	45566	305642	5285	4481925	97297	46.8319	5.43182	11.5986	11.6863
2020-05-15	45007	310653	5011	4582313	100388	44.833	4.99163	11.1338	9.18595
2020-05-16	44827	315013	4360	4679267	96954	46.2353	4.49698	9.72628	7.99521
2020-05-17	44823	318661	3648	4761822	82555	54.2947	4.41887	8.13868	7.71788
2020-05-18	44764	322139	3478	4852300	90478	49.475	3.84403	7.76964	6.93799
2020-05-19	45428	326724	4585	4948156	95856	47.3919	4.78322	10.0929	8.54462
2020-05-20	45800	331360	4636	5051690	103534	44.2367	4.47776	10.1223	7.09828
2020-05-21	45620	336321	4961	5160095	108405	42.0829	4.57636	10.8746	8.32599
2020-05-22	44583	340985	4664	5269030	108935	40.9262	4.28145	10.4614	4.33691
2020-05-23	53562	345174	4189	5369525	100495	53.2982	4.16837	7.82084	7.05631
2020-05-24	53224	348368	3194	5466872	97347	54.6745	3.28105	6.00105	5.62096
2020-05-25	53167	351677	3309	5557778	90906	58.4857	3.64002	6.22379	4.83635
2020-05-26	53101	355463	3786	5651670	93892	56.5554	4.03229	7.12981	5.72988
2020-05-27	52973	360780	5317	5759210	107540	49.2589	4.94421	10.0372	7.78923
2020-05-28	53975	365474	4694	5876956	117746	45.8402	3.98655	8.69662	5.54814
2020-05-29	53735	370402	4928	6003883	126927	42.3354	3.88255	9.17093	7.29281
2020-05-30	53503	374543	4141	6129345	125462	42.6448	3.3006	7.73975	5.24001
2020-05-31	53409	377828	3285	6239257	109912	48.5925	2.98875	6.15065	2.94195
2020-06-01	53407	380906	3078	6344984	105727	50.5141	2.91127	5.76329	5.40162
2020-06-02	54527	385579	4673	6461402	116418	46.8373	4.01398	8.57007	4.3714
2020-06-03	54202	390509	4930	6582770	121368	44.6592	4.06203	9.09561	3.22828
2020-06-04	53602	396083	5574	3714199	-2868571			10.3989
2020-06-05	53576	400993	4910	6845601	3131402			9.16455
2020-06-06	53587	405282	4289	6975232	129631	41.3381	3.30862	8.00381	5.58516
2020-06-07	53752	408726	3444	7090137	114905	46.7795	2.99726	6.4072	7.04659
2020-06-08	53798	411910	3184	7198773	108636	49.5213	2.93089	5.91844	4.25173
2020-06-09	54022	416682	4772	7320778	122005	44.2785	3.91132	8.83344	7.13205
2020-06-10	53805	421833	5151	7457681	136903	39.3015	3.76252	9.57346	3.94905
2020-06-11	53900	426836	5003	7596938	139257	38.7054	3.59264	9.282	4.7302
2020-06-12	53876	431451	4615	7740336	143398	37.571	3.21832	8.56597	5.36283
2020-06-13	54074	425717	4266	7875588	135252	39.9802	3.15411	7.88919	4.01712
2020-06-14	54098	439018	3301	8000109	124521	43.4449	2.65096	6.10189	4.4536
2020-06-15	54537	442458	3440	8126180	126071	43.259	2.72862	6.30764	3.78634
2020-06-16	54551	449047	6589	8270305	144125	37.8498	4.57173	12.0786	6.23702
2020-06-17	54397	454257	5210	8416893	146588	37.1088	3.55418	9.57773	4.85513
2020-06-18	54429	459416	5159	8558496	141603	38.4377	3.64328	9.4784	5.20425
2020-06-19	54726	464531	5115	8740983	182487	29.989	2.80294	9.34656	4.66699
2020-06-20	54444	468995	4464	8899018	158035	34.4506	2.82469	8.19925	3.92775
2020-06-21	54665	472356	3361	9030092	131074	41.7054	2.5642	6.14836	3.31923
2020-06-22	57886	476191	3835	9170164	140072	41.3259	2.73788	6.62509	4.69539
2020-06-23	57911	481650	5459	9334671	164507	35.2028	3.3184	9.42653	4.56799
2020-06-24	58415	486707	5057	9508977	174306	33.5129	2.90122	8.65702	3.83302
2020-06-25	57628	491882	5175	9690176	181199	31.8037	2.85598	8.98001	6.08412
2020-06-26	57643	496729	4847	9885578	195402	29.4997	2.48053	8.40865	4.96832
2020-06-27	57748	501291	4562	10063967	178389	32.372	2.55733	7.89984	4.49717
2020-06-28	57670	504766	3475	10228612	164645	35.0269	2.1106	6.02566	1.65954
2020-06-29	57531	508202	3436	10390659	162047	35.5027	2.12037	5.97243	3.15946
2020-06-30	57787	513241	5039	10566002	175343	32.9565	2.8738	8.71995	2.60159
2020-07-01	57987	518090	4849	10764787	198785	29.1707	2.43932	8.36222	3.75216
2020-07-02	58134	523247	5157	10974333	209546	27.7428	2.46103	8.87088	2.41055
2020-07-03	58838	528431	5184	11188111	213778	27.5229	2.42495	8.81063	1.88018
2020-07-04	58530	532964	4533	11383899	195788	29.8946	2.31526	7.74475	5.23774
2020-07-05	58538	536567	3603	11562286	178387	32.8152	2.01977	6.15498	4.08533
2020-07-06	57978	540140	3573	11734023	171737	33.7598	2.08051	6.16268
2020-07-07	58195	545655	3839	11942348	208325	27.9347	1.84279	6.59679	1.67526
2020-07-08	58325		5998	12157415	215067	27.1195	2.7889	10.2838	2.10089
2020-07-09	58460		5301	12382402	224987	25.9837	2.35614	9.06774	3.75921
2020-07-10	58896		5386	12621013	238611	24.6829	2.25723	9.14493	3.50063
2020-07-11	58831		5289	12838665	217652	27.0298	2.43003	8.99016	3.60859
2020-07-12	58925		4783	13038001	199336	29.5606	2.39947	8.1171	4.91232
2020-07-13	58871		3881	13235413	197412	29.8214	1.96594	6.59238	4.09802
2020-07-14	59552		3837	13456426	221013	26.945	1.7361	6.44311	2.52865
2020-07-15	59617		5579	13692951	236525	25.2054	2.35874	9.35807	1.98551
2020-07-16	59934		5522	13942933	249982	23.9753	2.20896	9.21347	2.27485
2020-07-17	60142		5759	14184543	241610	24.8922	2.38359	9.57567	3.07763
2020-07-18	59907		7376	14411739	227196	26.368	3.24654	12.3124	3.74762
2020-07-19	59809		4938	14634546	222807	26.8434	2.21627	8.25628	5.84654
2020-07-20	59807		3833	14840994	206448	28.9695	1.85664	6.40895	2.85961
2020-07-21	63786		4106	15081659	240665	26.5041	1.70611	6.43715	1.8559
2020-07-22	66173		6123	15363035	281376	23.5176	2.17609	9.25302	1.69276
2020-07-23	66266		6892	15639602	276567	23.9602	2.49198	10.4005	3.24891
2020-07-24	66238		9783	15929475	289873	22.8507	3.37493	14.7695	3.64429
2020-07-25	66175		6274	16191276	261801	25.2768	2.39648	9.48092	5.06621
2020-07-26	66278		5732	16416401	225125	29.4405	2.54614	8.64842	4.61205
2020-07-27	66579		3961	16635775	219374	30.3495	1.80559	5.94932	3.09041
2020-07-28	66501		4653	16885408	249633	26.6395	1.86394	6.99689	1.74006
2020-07-29	66416		6158	17175507	290099	22.8943	2.12272	9.27186	1.94334
2020-07-30	66407		6668	17462855	287348	23.1103	2.32053	10.0411	2.5257
2020-07-31	65530		6392	17754094	291239	22.5004	2.19476	9.75431	2.92624
2020-08-01	65698		6109	18013773	259679	25.2997	2.35252	9.29861	3.71449
2020-08-02	65798		5747	18237994	224221	29.3452	2.5631	8.73431	4.10432
2020-08-03	64732		4254	18438367	200373	32.3057	2.12304	6.57171	2.76181
2020-08-04	65438		4223	18693129	254762	25.6859	1.65763	6.45344	1.81111
2020-08-05	65511		6731	18965086	271957	24.0887	2.47502	10.2746	1.73782
2020-08-06	65218		7122	19247840	282754	23.0653	2.5188	10.9203	3.45151
2020-08-07	65131		6882	19530125	282285	23.0728	2.43796	10.5664	3.77915
2020-08-08	65144		6465	19800433	270308	24.0999	2.39172	9.92417	3.82561
2020-08-09	64852		5621	20024519	224086	28.9407	2.50841	8.66743	2.69261
2020-08-10	64552		4809	20239669	215150	30.0033	2.23518	7.44981	2.58068
2020-08-11	64472		4840	20505902	266233	24.2164	1.81796	7.50713	1.85474
2020-08-12	64663		6124	20794090	288188	22.4378	2.125	9.47064	1.81637
2020-08-13	64617		6890	21081995	287905	22.4439	2.39315	10.6628	2.82611
2020-08-14	64591		9922	21370621	288626	22.3788	3.43767	15.3613	3.08109
2020-08-15	62208		6254	21637493	266872	23.3101	2.34345	10.0534	5.2886
2020-08-16	62256		5654	21854422	216929	28.6988	2.60638	9.08186	2.73932
2020-08-17	62029		4222	22052908	198486	31.2511	2.1271	6.80649	2.46404
2020-08-18	61924		4261	22306851	253943	24.385	1.67794	6.88102	1.64601
2020-08-19	61917		6684	22578597	271746	22.7849	2.45965	10.7951	1.666
2020-08-20	61823		6514	22852287	273690	22.5887	2.38007	10.5365	3.11736
2020-08-21	61829		6213	23117465	265178	23.316	2.34295	10.0487	3.37054
2020-08-22	61777		5547	23387848	270383	22.848	2.05153	8.97907	3.08915
2020-08-23	61701		4598	23601572	213724	28.8695	2.15137	7.45207	3.15158
2020-08-24	61630		4325	23820900	219328	28.0995	1.97193	7.01769	1.66983
2020-08-25	61696		6202	24077646	256746	24.03	2.41562	10.0525	1.72491
2020-08-26	61716		6466	24358387	280741	21.9833	2.30319	10.477	2.31058
2020-08-27	61412		6223	24638399	280012	21.9319	2.2224	10.1332	2.94779
2020-08-28	61264		5837	24931194	292795	20.9239	1.99354	9.52762	3.03631
2020-08-29	61274		5497	25196584	265390	23.0883	2.07129	8.97118	2.77163
2020-08-30	61371		4353	25425360	228776	26.8258	1.90273	7.09293	2.74534
2020-08-31	61139		4346	25676125	250765	24.381	1.7331	7.10839	1.86697
2020-09-01	60408		5978	25940080	263955	22.8857	2.26478	9.89604	1.70811
2020-09-02	60700		6457	26229159	289079	20.9977	2.23365	10.6376	2.39135
2020-09-03	60882		6004	26520488	291329	20.898	2.0609	9.8617	2.69985
2020-09-04	60875		5863	26828863	308375	19.7406	1.90126	9.63121	2.27572
2020-09-05	60823		5003	27108295	279432	21.7667	1.79042	8.22551	2.66374
2020-09-06	60007		4247	27350309	242014	24.7948	1.75486	7.07751	2.35816
2020-09-07	60393		3872	27555752	205443	29.3965	1.88471	6.41134	1.89041
2020-09-08	60316		4429	27805672	249920	24.1341	1.77217	7.34299	1.6004
2020-09-09	60654		6230	28096189	290517	20.878	2.14445	10.2714	1.63567
2020-09-10	60797		6021	28401505	305316	19.9128	1.97206	9.90345	2.57538
2020-09-11	60973		5792	28720515	319010	19.1132	1.81562	9.49929	2.49271
2020-09-12	60959		5116	29013110	292595	20.8339	1.74849	8.39253	2.53344
2020-09-13	60743		4002	29268007	254897	23.8304	1.57005	6.58841	2.3086
2020-09-14	60769		4264	29518989	250982	24.2125	1.69893	7.01674	1.60385
2020-09-15	60972		6000	29801618	282629	21.5732	2.12292	9.84058	1.62361
2020-09-16	61275		6007	30112306	310688	19.7224	1.93345	9.80335	2.27511
2020-09-17	61379		5412	30428541	316235	19.4093	1.71139	8.81735	2.51031
2020-09-18	61300		5453	30754410	325869	18.8112	1.67337	8.8956	1.80469
2020-09-19	61359		5200	31056265	301855	20.3273	1.72268	8.47471	2.18254
2020-09-20	61464		3992	31314788	258523	23.7751	1.54416	6.49486	2.0902
2020-09-21	61702		3810	31553548	238760	25.8427	1.59574	6.17484	1.42857
2020-09-22	61975		5364	31832486	278938	22.2182	1.92301	8.6551	1.33467
2020-09-23	62373		6048	32150466	317980	19.6154	1.90201	9.6965	1.89565
2020-09-24	63374		5558	32467515	317049	19.9887	1.75304	8.77016	2.41702
2020-09-25	63762		5462	32794817	327302	19.4811	1.6688	8.56623	2.23624
2020-09-26	65345		5101	33099621	304804	21.4384	1.67353	7.80626	2.29347
2020-09-27	65335		3795	33361456	261835	24.9527	1.44939	5.80853	2.21186
2020-09-28	65393		3536	33600009	238553	27.4124	1.48227	5.40731	1.55966
2020-09-29	65649		5498	33891696	291687	22.5067	1.8849	8.37484	1.31948
2020-09-30	66002		5836	34210542	318846	20.7003	1.83035	8.84216	1.93394
2020-10-01	66066		5623	34536511	325969	20.2676	1.72501	8.51119	2.41173
2020-10-02	66224		5622	34866505	329994	20.0682	1.70367	8.48937	2.47533
2020-10-03	66269		4874	35172075	305570	21.687	1.59505	7.35487	2.43737
2020-10-04	66416		4123	35429872	257797	25.7629	1.59932	6.20784	2.12104
2020-10-05	66878		4270	35703459	273587	24.4449	1.56075	6.38476	1.64492
2020-10-06	67775		5576	36016583	313124	21.6448	1.78076	8.22722	1.55356
2020-10-07	67413		5938	36367310	350727	19.2209	1.69305	8.80839	1.9797
2020-10-08	67817		6431	36724388	357078	18.9922	1.80101	9.48287	2.48712
2020-10-09	68431		5894	37091530	367142	18.6388	1.60537	8.61306	2.55518
2020-10-10	68613		5267	37462240	370710	18.5085	1.42079	7.67639	2.68297
2020-10-11	68862		3974	37752317	290077	23.7392	1.36998	5.77096	2.2109
2020-10-12	69081		3782	38030077	277760	24.8708	1.36161	5.47473	1.57996
2020-10-13	69974		5002	38351818	321741	21.7485	1.55467	7.14837
2020-10-14	70141		6101	38738552	386734	18.1368	1.57757	8.69819	0.567988
2020-10-15	70888		6119	39141586	403034	17.5886	1.51823	8.63193	2.41961
2020-10-16	71434		6226	39561420	419834	17.0148	1.48297	8.71574	2.17716
2020-10-17	71933		5720	39953727	392307	18.3359	1.45804	7.95184	2.65484
2020-10-18	71975		4110	40299336	345609	20.8256	1.18921	5.71032	2.48957
2020-10-19	72710		4440	40648388	349052	20.8307	1.27202	6.10645	1.68964
2020-10-20	77014		6190	41040367	391979	19.6475	1.57917	8.0375	1.63664
2020-10-21	74109		6856	41485055	444688	16.6654	1.54176	9.25124	2.14418
2020-10-22	75052		6502	41965307	480252	15.6276	1.35387	8.66333	2.53475
2020-10-23	76330		6555	42460161	494854	15.4248	1.32463	8.58771	2.64472
2020-10-24	77210		5747	42933167	473006	16.3233	1.215	7.44334	2.65697
2020-10-25	77737		4659	43359473	426306	18.235	1.09288	5.99329	2.34062
2020-10-26	79053		5113	43776384	416911	18.9616	1.2264	6.46781	1.64716
2020-10-27	79907		7055	44243825	467441	17.0946	1.50928	8.82901	1.88856
2020-10-28	81180		7167	44754138	510313	15.9079	1.40443	8.82853	2.57752
2020-10-29	82231		7170	45300457	546319	15.0518	1.31242	8.71934	2.65061
2020-10-30	83362		7521	45873999	573542	14.5346	1.31133	9.0221	2.71975
2020-10-31	84228		6664	46370830	496831	16.953	1.3413	7.91186	3.05612
2020-11-01	85253		5480	46832803	461973	18.4541	1.18622	6.42793	2.46376
2020-11-02	86536		5761	47309803	477000	18.1417	1.20776	6.65734	1.95572
2020-11-03	88125		8250	47803031	493228	17.867	1.67265	9.3617	1.96171
2020-11-04	89294		9182	48375971	572940	15.5852	1.60261	10.2829	2.63998
2020-11-05	90059		8869	48994181	618210	14.5677	1.43463	9.84799	2.93095
2020-11-06	90831		9260	49620817	626636	14.495	1.47773	10.1948	3.27877
2020-11-07	91748		7722	50244127	623310	14.7195	1.23887	8.41653	3.36653
2020-11-08	92595		6127	50741556	497429	18.6147	1.23173	6.61699	3.31146
2020-11-09	93899		6127	51233449	491893	19.0893	1.2456	6.5251	2.3325
2020-11-10	94954		9358	51791885	558436	17.0036	1.67575	9.8553	1.89205
2020-11-11	64768		10191	52411896	620011	10.4463	1.64368	15.7346	3.22344
2020-11-12	95684		9683	53057986	646090	14.8097	1.49871	10.1198	1.90089
2020-11-13	97022		10000	53720550	662564	14.6434	1.50929	10.3069	3.10628
2020-11-14	98124		9220	54316056	595506	16.4774	1.54826	9.39627	3.15843
2020-11-15	98807		7108	54828284	512228	19.2897	1.38766	7.19382	3.51641
